# Supplementary material for: Amorphous tetrazine–triazine-functionalized covalent organic framework for adsorption and removal of dyes
Source: Royal Society of Chemistry journal article supplement (doi:10.1039/d3nj01913f), 2023-01-01
Supplement: d3nj01913f1.pdf [file d3nj01913f1.pdf]

*Electronic Supporting Information*

**Amorphous Tetrazine-Triazine-Functionalized Covalent Organic Framework for Adsorption and Removal of Dyes**

Shubham Kumar, Kusum Kumari, Saurabh K. Singh, Bharat Z. Dholakiya and Ritambhara Jangir\*

## Table of Contents

| Section | Content                                                   |
|---------|-----------------------------------------------------------|
| S1      | Materials                                                 |
| S2      | Characterization                                          |
| S3      | Synthetic Procedures                                      |
| S4      | CHN analysis of TzTPT-COF                                 |
| S5      | FTIR spectrum of TzTPT-COF                                |
| S6      | TGA of TzTPT-COF                                          |
| S7      | PXRD of the COF                                           |
| S8      | Field Emission Scanning Electron Microscopy (FE-SEM)      |
| S9      | High Resolution Transmission Electron Microscopy (HR-TEM) |
| S10     | Dye Adsorption Study with TzTPT-COF                       |
| S11     | Reusability Test                                          |
| S12     | Chemical stability of TzTPT-COF                           |
| S13     | Modeling and Theoretical Simulations                      |
| S14     | Comparison study of MB adsorption on different adsorbents |

## Schemes and Figures

|            |                                                                                                                                                                                                            |
|------------|------------------------------------------------------------------------------------------------------------------------------------------------------------------------------------------------------------|
| Scheme S1  | Synthesis of 4,4',4''-((1,3,5-triazine-2,4,6-triyl)tris(oxy))tribenzaldehyde (TPT-CHO).                                                                                                                    |
| Figure S1  | Fourier transform infrared spectrum of TPT-CHO.                                                                                                                                                            |
| Figure S2  | <sup>1</sup> H NMR spectrum of TPT-CHO in DMSO-d <sub>6</sub> (400 MHz).                                                                                                                                   |
| Figure S3  | <sup>13</sup> C NMR spectrum of TPT-CHO in DMSO-d <sub>6</sub> (400 MHz).                                                                                                                                  |
| Scheme S2  | Synthesis of s-tetrazine diamine (Tz).                                                                                                                                                                     |
| Figure S4  | Fourier transform infrared spectrum of s-tetrazine diamine (Tz).                                                                                                                                           |
| Figure S5  | <sup>1</sup> H NMR spectrum of s-tetrazine diamine (Tz) in DMSO-d <sub>6</sub> (400 MHz).                                                                                                                  |
| Figure S6  | <sup>13</sup> C NMR spectrum of s-tetrazine diamine (Tz) in DMSO-d <sub>6</sub> (400 MHz).                                                                                                                 |
| Scheme S3  | Synthesis of TzTPT-COF from corresponding monomer Tz and TPT-CHO.                                                                                                                                          |
| Table S1   | CHN analysis of TzTPT-COF                                                                                                                                                                                  |
| Figure S7  | FTIR spectra of (a) TzTPT-COF, (b) TPT-CHO and (c) s-tetrazine-diamine (Tz).                                                                                                                               |
| Figure S8  | TGA of TzTPT-COF under N <sub>2</sub> flow with a heating rate of 10 °C/min.                                                                                                                               |
| Figure S9  | Comparative PXRD patterns of the TPT-CHO, Tz Precursors and TzTPT-COF.                                                                                                                                     |
| Figure S10 | PXRD patterns of TzTPT-COF after soaking in different solvents.                                                                                                                                            |
| Figure S11 | FE-SEM images of TzTPT-COF at different resolutions.                                                                                                                                                       |
| Figure S12 | HR-TEM images of the TzTPT-COF under different magnifications.                                                                                                                                             |
| Figure S13 | SAED pattern of TzTPT-COF.                                                                                                                                                                                 |
| Figure S14 | Chemical structures of the different dyes tested for adsorption with the TzTPT-COF.                                                                                                                        |
| Table S2   | Isotherm parameters for the adsorption of MB on TzTPT-COF.                                                                                                                                                 |
| Table S3   | Kinetic parameters for the adsorption of MB on TzTPT-COF.                                                                                                                                                  |
| Figure S15 | The adsorption isotherm for MB on TzTPT-COF (a) Q <sub>eq</sub> vs C <sub>o</sub> , (b) Q <sub>eq</sub> vs C <sub>eq</sub> at room temperature (RT), 40 °C, and 50 °C, and the corresponding Langmuir plot |

|            |                                                                                                                                                                                                                                        |
|------------|----------------------------------------------------------------------------------------------------------------------------------------------------------------------------------------------------------------------------------------|
|            | for MB (c).                                                                                                                                                                                                                            |
| Table S4   | Isotherm parameters for the adsorption of MB on TzTPT-COF at different temperatures.                                                                                                                                                   |
| Figure S16 | (a) Pseudo-second-order kinetic model plots for the adsorption of MB on TzTPT-COF at different initial concentrations, (b) Fitting curve of adsorption on MB through Pseudo-second-order kinetic model.                                |
| Table S5   | Kinetic parameters for the adsorption of MB on TzTPT-COF at different initial concentrations.                                                                                                                                          |
| Figure S17 | UV-Vis spectra of an aqueous MB solution (initial concentration: 10 mg L <sup>-1</sup> ) after 30 minutes after the addition of the (a) Tz, (b) TPT-CHO and (c) Mixture of Tz and TPT-CHO.                                             |
| Figure S18 | (a) Pseudo-second-order kinetic model plots for the adsorption of RhB on TzTPT-COF at different initial concentrations, (b) Fitting curve of adsorption on MB through Pseudo-second-order kinetic model.                               |
| Table S6   | Kinetic parameters for the adsorption of RhB on TzTPT-COF at different initial concentrations.                                                                                                                                         |
| Table S7   | EDA-NOCV energies computed at PBE-D3BJ/TZP level of the theory for MB and RhB dyes adsorbed on TzTPT-COF. All the values are in kcal/mol.                                                                                              |
| Figure S19 | Plot of electron deformation densities (EDD) corresponding to the highest interaction $\Delta E_{orb(1)}$ for MB@ TzTPT-COF and RhB@TzTPT-COF.                                                                                         |
| Figure S20 | Reusability of the TzTPT-COF for the removal of MB within 20 min.                                                                                                                                                                      |
| Figure S21 | FT-IR spectra of TzTPT-COF as-synthesized, after recyclability from dye experiments.                                                                                                                                                   |
| Figure S22 | PXRD spectra of TzTPT-COF as-synthesized, after recyclability from dye experiments.                                                                                                                                                    |
| Figure S23 | (a) Powder X-ray diffraction study of TzTPT-COF. Experimental (black line), simulated AA-stacking model (red line) and AB-stacking model (blue line). (b) eclipsed AA-stacking model. (c) Staggered AB-stacking model.                 |
| Figure S24 | DFT-optimized structures of dyes (a) MB, (b) TOLO, (c) AZA, (d) AZB, (e) RhB.                                                                                                                                                          |
| Figure S25 | DFT-optimized structures of respective dyes absorbed on TzTPT-COF (a) MB (b) TOLO (c) AZA (d) AZB (e) RhB.                                                                                                                             |
| Table S8   | Cartesian atomic coordinates for the smallest unit cell of TzTPT-COF.                                                                                                                                                                  |
| Table S9   | Comparison of the maximum equilibrium adsorption capacity of the MB dye on different adsorbents at room temperature.                                                                                                                   |
| Figure S26 | (a) Comparison of the adsorption capacity of TzTPT-COF with different type of natural adsorbents, (b) Comparison of the adsorption capacity and Bet Surface area of TzTPT-COF with different type of natural adsorbents.               |
| Figure S27 | (a) Comparison of the adsorption capacity of TzTPT-COF with different type of MOFs adsorbents, (b) Comparison of the adsorption capacity and Bet Surface area of TzTPT-COF with different type of MOFs adsorbents.                     |
| Figure S28 | (a) Comparison of the adsorption capacity of TzTPT-COF with different type of porous polymer adsorbents, (b) Comparison of the adsorption capacity and Bet Surface area of TzTPT-COF with different type of porous polymer adsorbents. |
| Figure S29 | (a) Comparison of the adsorption capacity of TzTPT-COF with different type of                                                                                                                                                          |

other adsorbents, (b) Comparison of the adsorption capacity and Bet Surface area of TzTPT-COF with different type of other adsorbents.

## S1. Materials

4-hydroxybenzaldehyde, triethylamine, 1,4-Dioxane, cyanuric chloride, ethyl acetate, 4-aminobenzonitrile, hydrazine hydrate, DMSO and hydrogen peroxide were purchased from Sigma Aldrich. Sulphur powder, ethanol, acetone were received from Spectrochem. All the reagents and solvents were of analytical grade, hence were used without any further purification.

## S2. Characterization

**$^1\text{H}$  and  $^{13}\text{C}$  NMR spectroscopy.** NMR spectra were recorded using an ECS 400MHz (JEOL) NMR spectrometer, using DMSO- $d_6$  and  $\text{CDCl}_3$  as solvents and tetramethylsilane (TMS) as the external standard. Chemical shifts are provided in parts per million (ppm).

**Fourier transform infrared (FT-IR) spectroscopy.** FT-IR spectra were recorded using a SHIMADZU IR Affinity-1 Instrument; 45 scans were collected at a resolution of  $4\text{ cm}^{-1}$ .

**$^{13}\text{C}$  Solid-State Nuclear Magnetic Resonance (NMR) Spectroscopy.** Solid-State Nuclear Magnetic Resonance spectrum was recorded at IISC Bangalore using JEOL 400MHz (ECX400) spectrometer solid state NMR spectrometer and a Bruker magic-angle-spinning (MAS) probe, running 32,000 scans.

**Powder X-ray diffraction.** Powder XRDs were carried out using a X-Ray Diffractometer (Panalytical X Pert Pro) instruments. The data analysis was performed using the Reflex module of the Materials Studio V6.0.

**Thermo-gravimetric analysis.** Thermo-gravimetric analysis was carried out on Thermogravimetric Differential thermal analyzer (TGA-DTA) TA Module Q 600 system. The TGAs were done under  $\text{N}_2$  gas flow (20ml/min) (purge + protective) and samples were heated from RT to  $800\text{ }^\circ\text{C}$  at  $10\text{K/min}$ .

**Surface area and porosimetry (ASAP/BET).** The BET surface areas and porosimetry measurements of the prepared samples (ca. 20-100 mg) were performed using a Nova Touch LX2 gas sorption analyzer from Quantachrome surface area and porosity analyzer. Nitrogen isotherms were generated through incremental exposure to ultrahigh-purity  $\text{N}_2$  (up to ca. 1 atm) in a liquid  $\text{N}_2$  (77 K) bath.

**Field Emission-Scanning Electron Microscopy (FE-SEM):** FE-SEM was conducted using a Nova Nano FE-SEM 450 (FEI) scanning electron microscope. Samples were subjected to Pt sputtering for 100 s prior to observation.

**High resolution Transmission Electron Microscopy (HR-TEM):** Transmission electron microscopy (TEM) was performed using Tecnai G2 20 S-TWIN [FEI] TEM microscope operating at an accelerating voltage of (200 kV). The diffractograms were recorded at a scanning rate of  $1^\circ\text{ min}^{-1}$  between  $20^\circ$  and  $80^\circ$ .

### S3. Synthetic Procedures

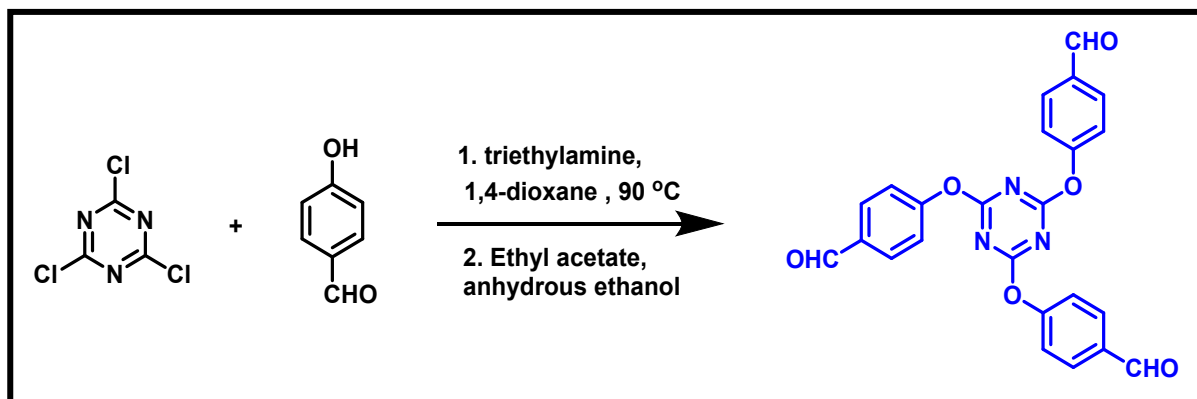

**Scheme S1.** Synthesis of 4,4',4''-((1,3,5-triazine-2,4,6-triyl)tris(oxy))tribenzaldehyde (TPT-CHO).

**4,4',4''-((1,3,5-triazine-2,4,6-triyl)tris(oxy))tribenzaldehyde (TPT-CHO):** 4,4',4''-((1,3,5-triazine-2,4,6-triyl)tris(oxy))tribenzaldehyde (TPT-CHO) was synthesized using a reported procedure.<sup>1</sup> A 150 mL three-necked flask was charged with 4-hydroxybenzaldehyde (6.1 g, 0.05 mol) and triethylamine (6.325 g, 0.0625 mol), dissolved in 1,4-dioxane (60 mL) as a solvent with stirring. Cyanuric chloride (2.3 g, 0.125 mol) was dissolved in 1,4-dioxane (30 mL), and the solution was slowly added dropwise to the flask and continuously stirred for 12 hours. The mixture was then heated to 90°C for 6 hours, cooled to room temperature, and the resulting white solid was filtered from the reaction mixture. The filtrate was evaporated under reduced pressure and recrystallized from a mixture of ethyl acetate and anhydrous ethanol. This resulted in a white precipitate, which was filtered, dried, and obtained as 4.8 g of the final product with a yield of 85%. The product was characterised by IR (Figure S1) and <sup>1</sup>H (Figure S2) and <sup>13</sup>C NMR (Figure S3) studies. <sup>1</sup>H-NMR (DMSO-d<sub>6</sub>, 400 MHz): δ= 9.93 (s, 3H), 7.92 (d, 6H), 7.42 (d, 6H). <sup>13</sup>C-NMR (DMSO-d<sub>6</sub>, 400 MHz): 192.45, 173.21, 156.12, 134.58, 131.67, 122.86 ppm.

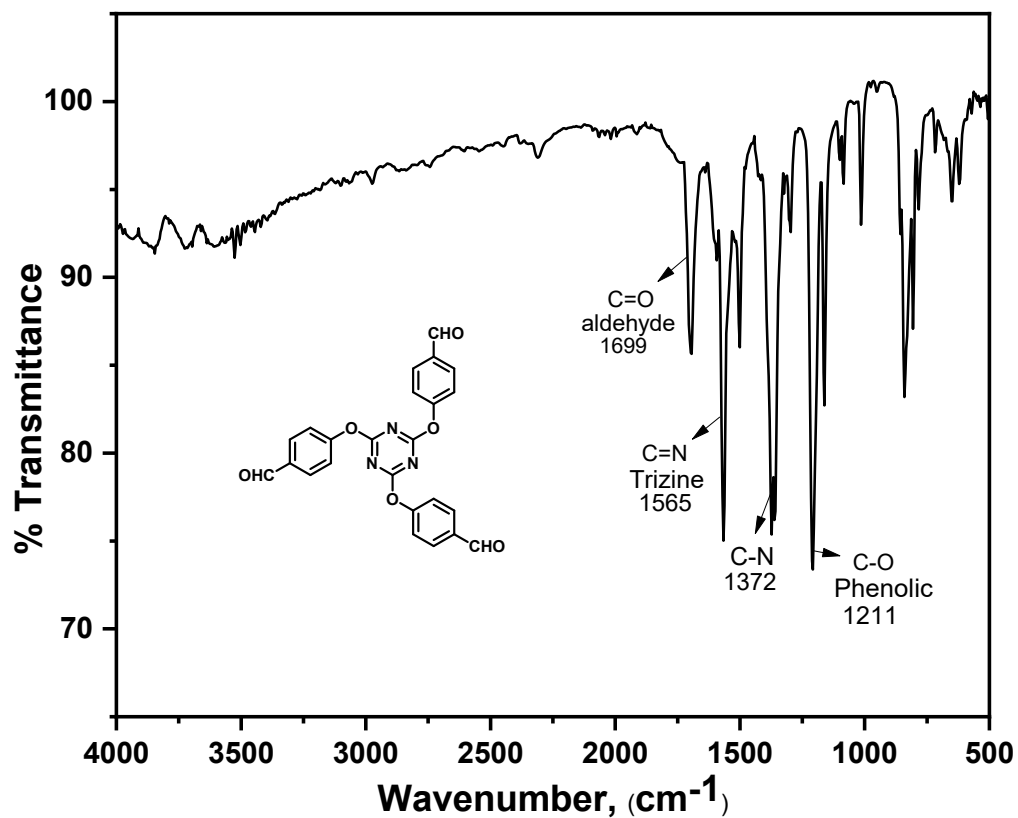

Figure S1. Fourier transform infrared spectrum of TPT-CHO.

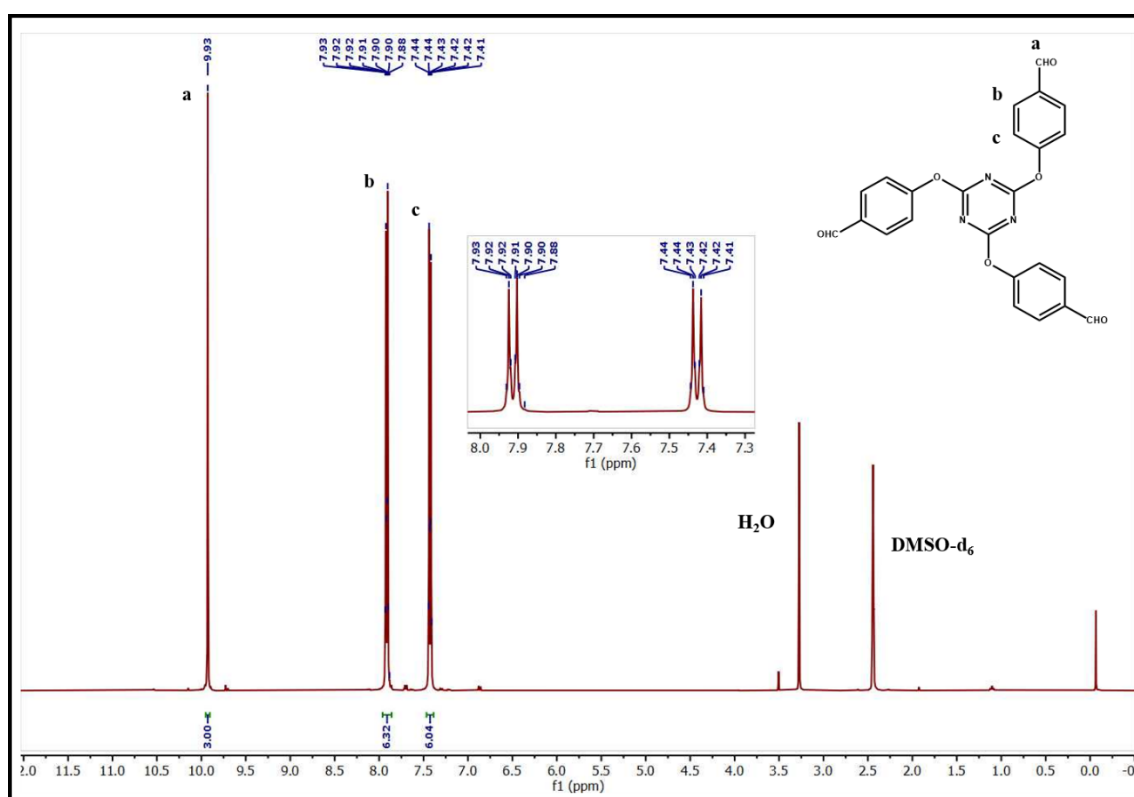

Figure S2.  $^1\text{H}$  NMR spectrum of TPT-CHO in  $\text{DMSO-d}_6$  (400 MHz).

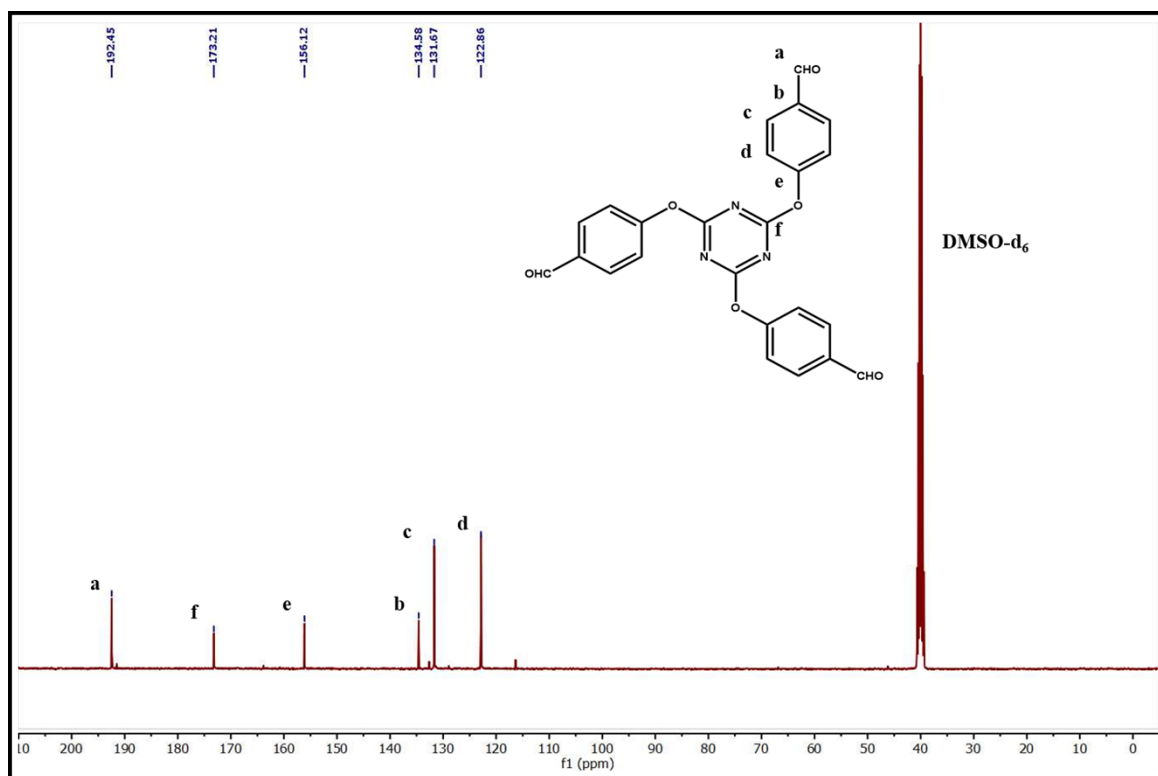

Figure S3. <sup>13</sup>C NMR spectrum of TPT-CHO in DMSO-d<sub>6</sub> (400 MHz).

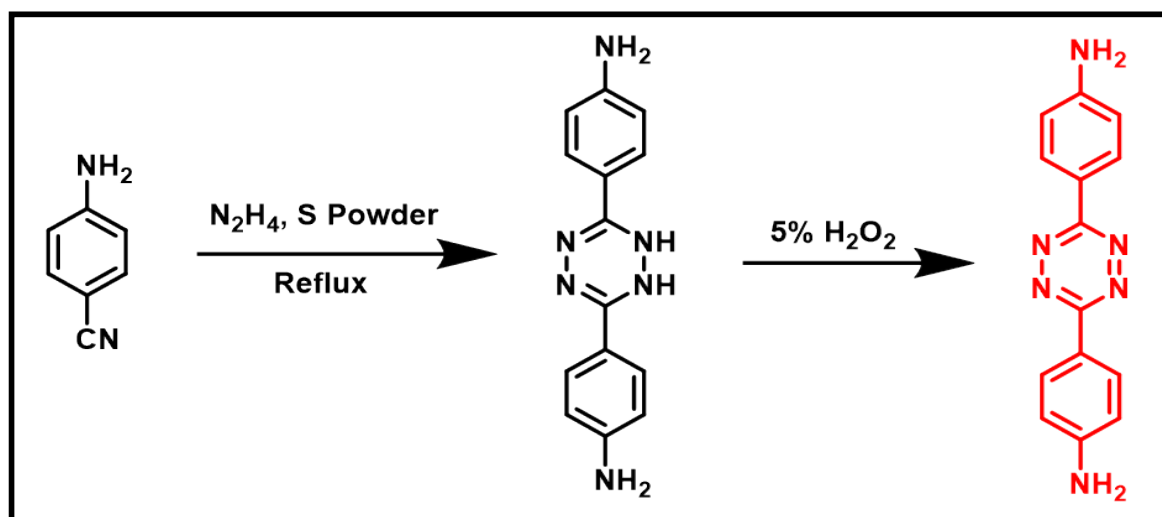

Scheme S2. Synthesis of s-tetrazine diamine (Tz).

**Synthesis of s-tetrazine diamine (Tz):** s-tetrazine diamine (Tz) was synthesized by the modification in the reported literature. In a typical synthesis, 4 g of 4-aminobenzonitrile was dissolved in 20 mL of methanol.<sup>2</sup> 15 mL of hydrazine hydrate (conc. 99%) and 4 g of sulphur powder were added to the solution, which was then refluxed at 90°C for 8 hours, leading to the formation of a bright golden yellow colored thick suspension. The suspension was filtered, washed repeatedly with methanol and acetone, and subjected to vacuum drying overnight. The resulting bright yellow powder was dispersed in dry dimethyl sulfoxide

(DMSO) by stirring and underwent an overnight oxygen (O<sub>2</sub>) purging process. A bright-red product was precipitated out of this oxidized compound when 150 ml of distilled water was added. The product was filtered, dried, and fully oxidized by dispersing it in a 5% hydrogen peroxide solution. Centrifugation was used to separate the bright red product, which was then vacuum-dried for 12 hours. The synthesis reaction resulted in the formation of 1.5 grams of a bright red product, with a yield of 37.5 percent. The product was washed with acetone and characterised by IR (Figure S4) and <sup>1</sup>H (Figure S5) and <sup>13</sup>C NMR (Figure S6) studies. <sup>1</sup>H-NMR (DMSO-d<sub>6</sub>, 400 MHz): δ= 8.08 (d, 4H), 6.68 (d, 4H), 5.91 (s, 4H), <sup>13</sup>C-NMR (DMSO-d<sub>6</sub>, 125 MHz):162.83, 152.61, 129.09, 119.36, 114.77.

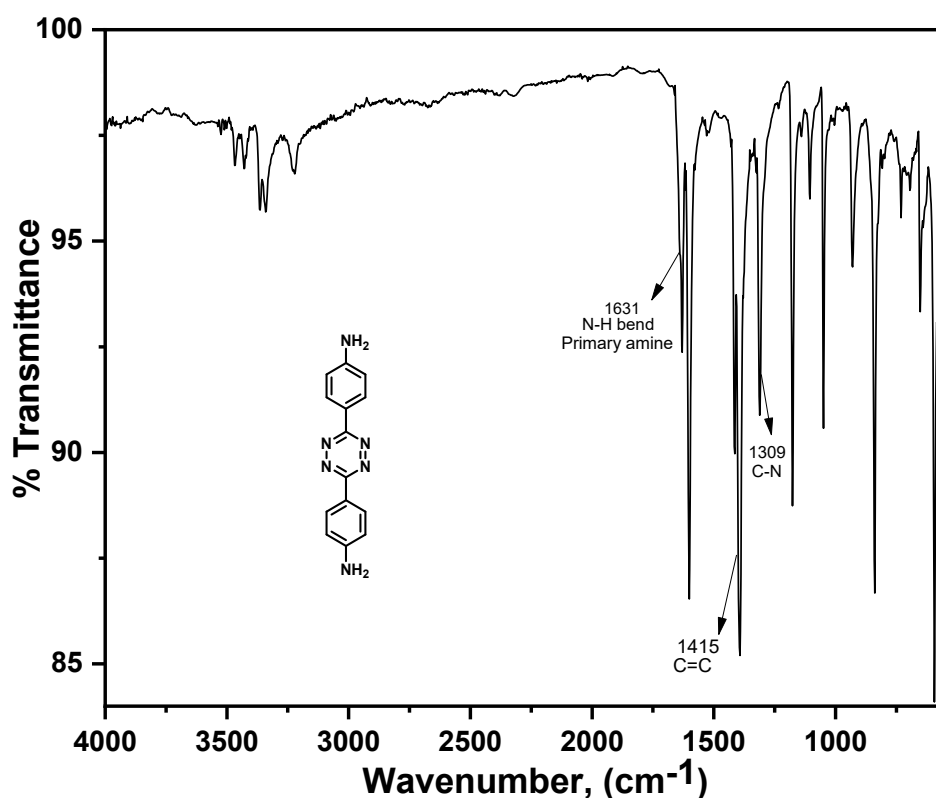

**Figure S4.** Fourier transform infrared spectrum of s-tetrazine diamine (Tz).



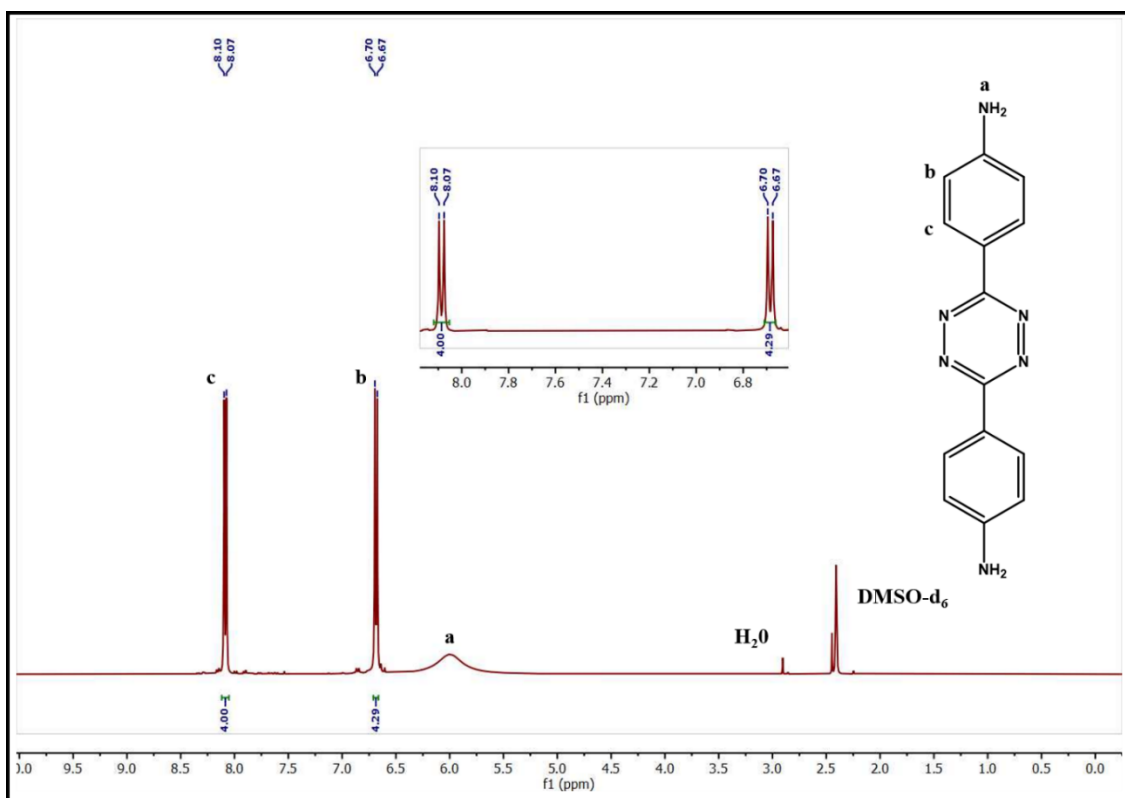

**Figure S5.**  $^1\text{H}$  NMR spectrum of s-tetrazine diamine (Tz) in  $\text{DMSO-d}_6$  (400 MHz).

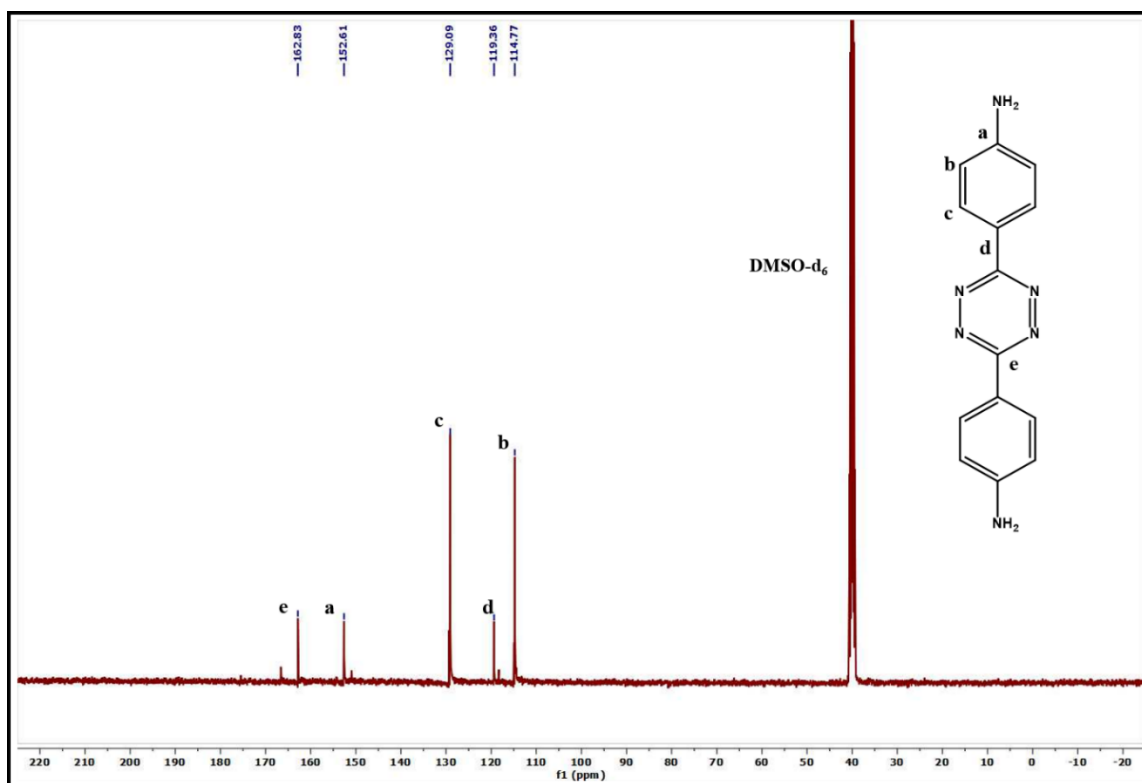

**Figure S6.**  $^{13}\text{C}$  NMR spectrum of s-tetrazine diamine (Tz) in  $\text{DMSO-d}_6$  (400 MHz).

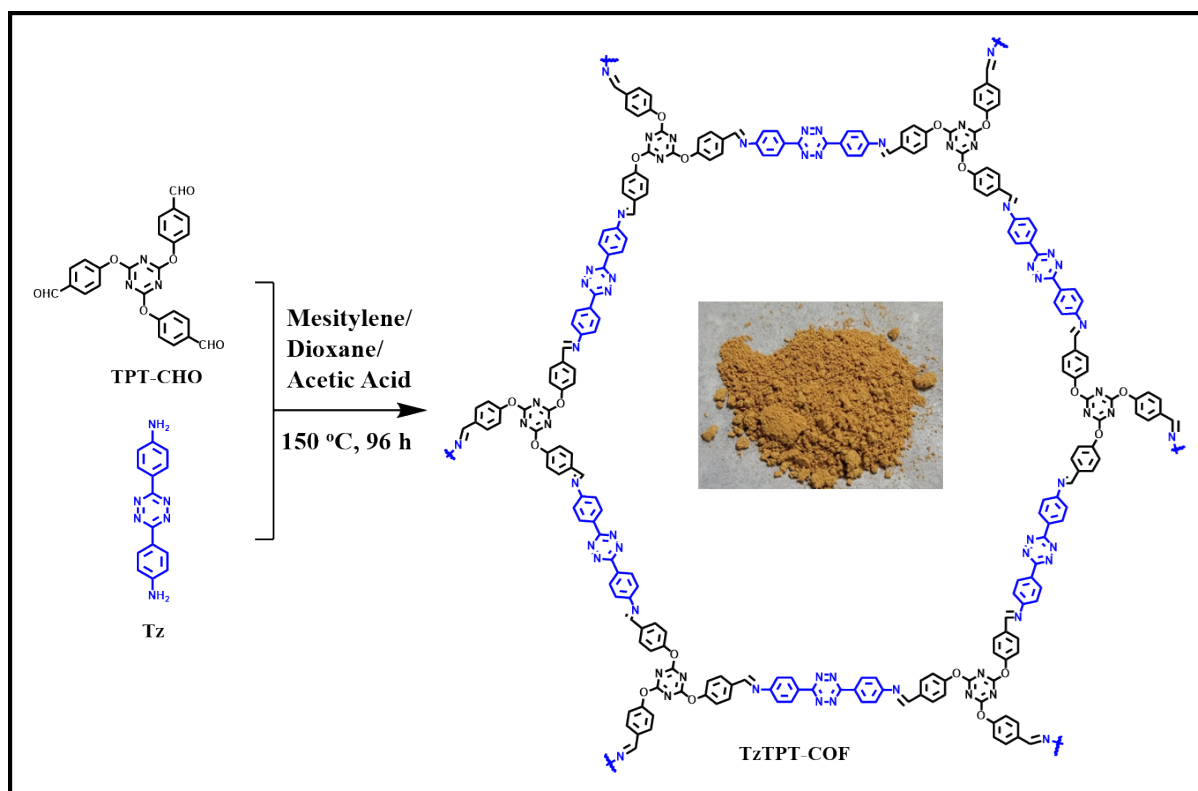

**Scheme S3.** Synthesis of TzTPT-COF from corresponding monomer Tz and TPT-CHO.

**Synthesis of TzTPT-COF:** TPT-CHO (132 mg, 0.3 mmol) and s-tetrazine-diamine (118 mg, 0.45 mmol) were dissolved in a mixture of 6.0 mL of dioxane and 6.0 mL of mesitylene and stirred until homogenization was achieved, resulting in a red solution. Subsequently, 1.0 mL of a 0.6 M acetic acid was added to the mixture. The Pyrex tube containing the reaction mixture was flash-frozen in liquid nitrogen and sealed before being subjected to thermal treatment at 150 °C for 4 days, followed by a slow cooling to room temperature over a period of 12 hours. This process yielded approximately 170 mg of a bright yellow coloured solid, which was subsequently washed with hot DMF, dioxane, MeOH, acetone, and THF (68%, isolated yield).

#### S4. CHN analysis of TzTPT-COF

**Table S1.** CHN analysis of TzTPT-COF:

| Mol. Weight (g/mol) | Formula                      |            | C       | H      | N       |
|---------------------|------------------------------|------------|---------|--------|---------|
| 4096.13             | $C_{234}H_{156}N_{60}O_{18}$ | Calculated | 68.61%  | 3.84%  | 20.52%  |
|                     |                              | Obtained   | 66.171% | 3.455% | 18.815% |

## S5. FTIR spectrum of TzTPT-COF

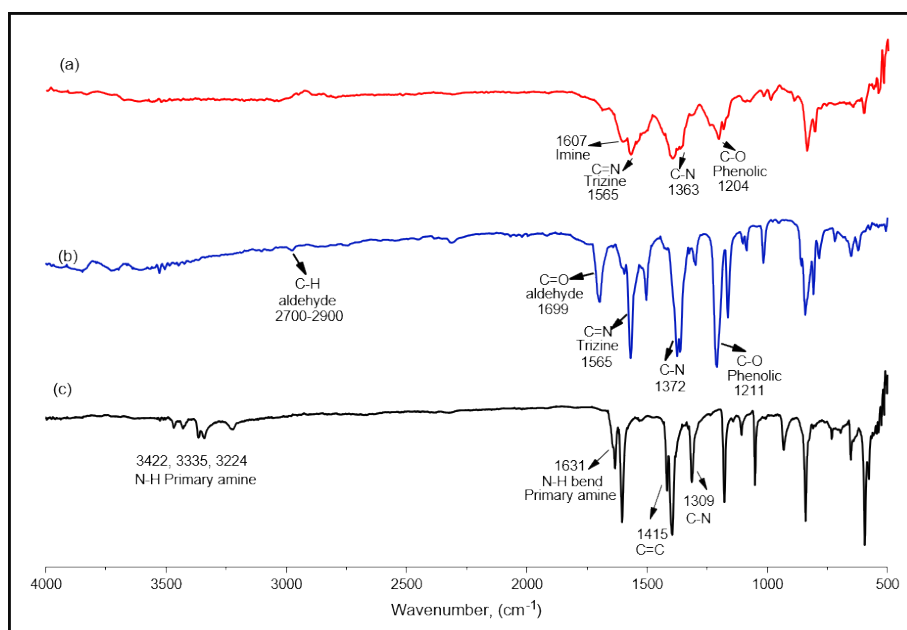

Figure S7. FTIR spectra of (a) TzTPT-COF, (b) TPT-CHO and (c) s-tetrazine-diamine (Tz).

## S6. TGA of TzTPT-COF

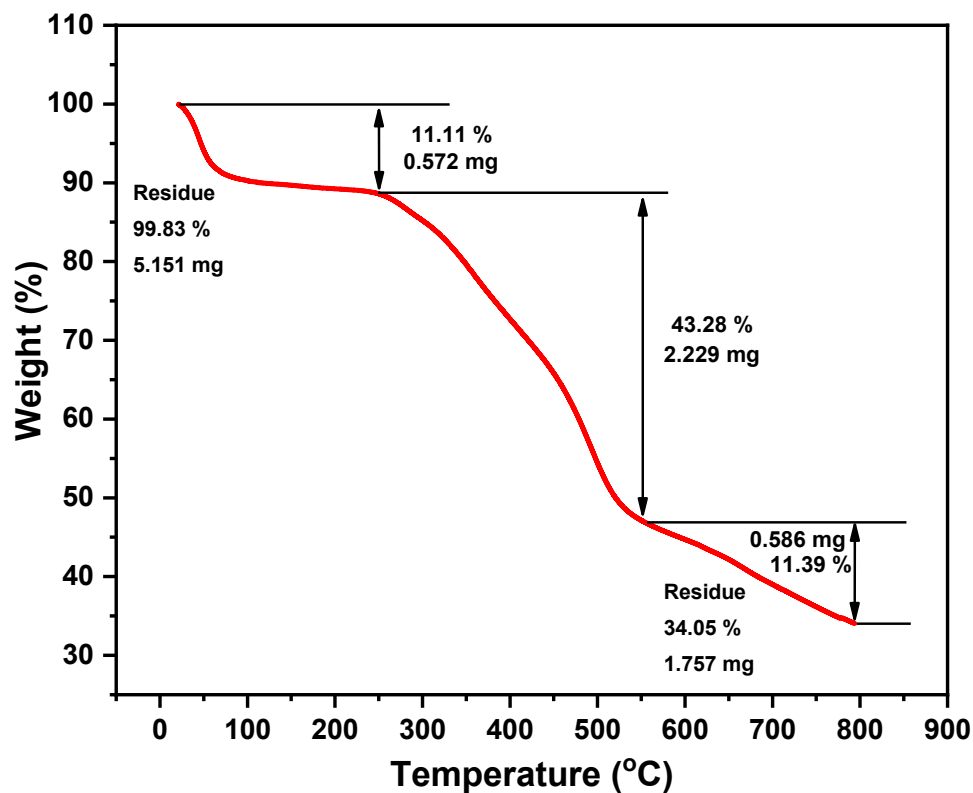

Figure S8. TGA of TzTPT-COF under  $\text{N}_2$  flow with a heating rate of  $10\text{ }^{\circ}\text{C}/\text{min}$ .

## S7. PXRD of the COF

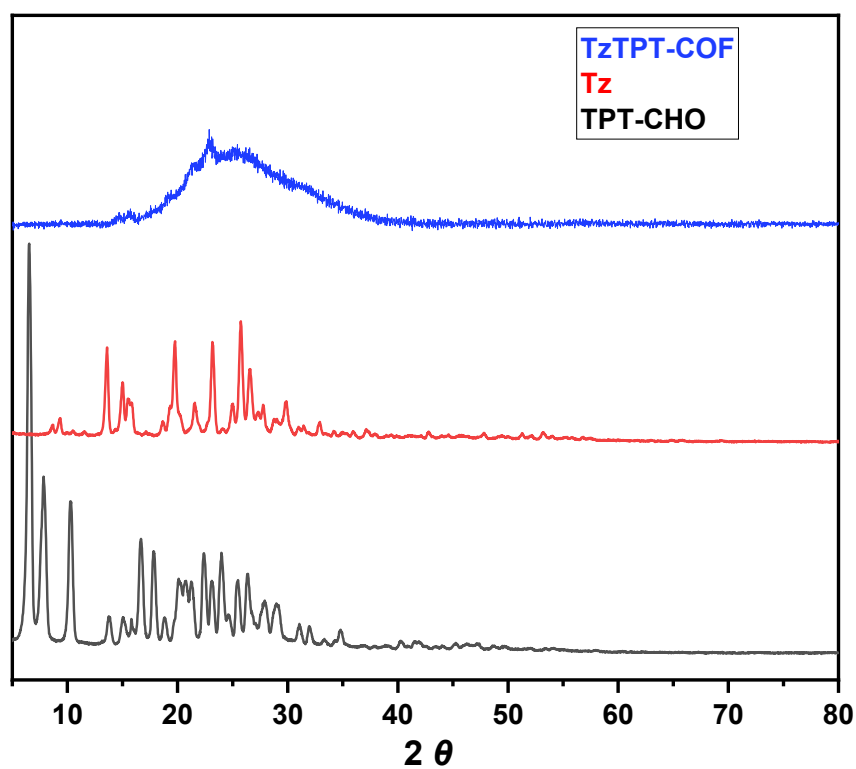

**Figure S9.** Comparative PXRD patterns of the TPT-CHO, Tz Precursors and TzTPT-COF.

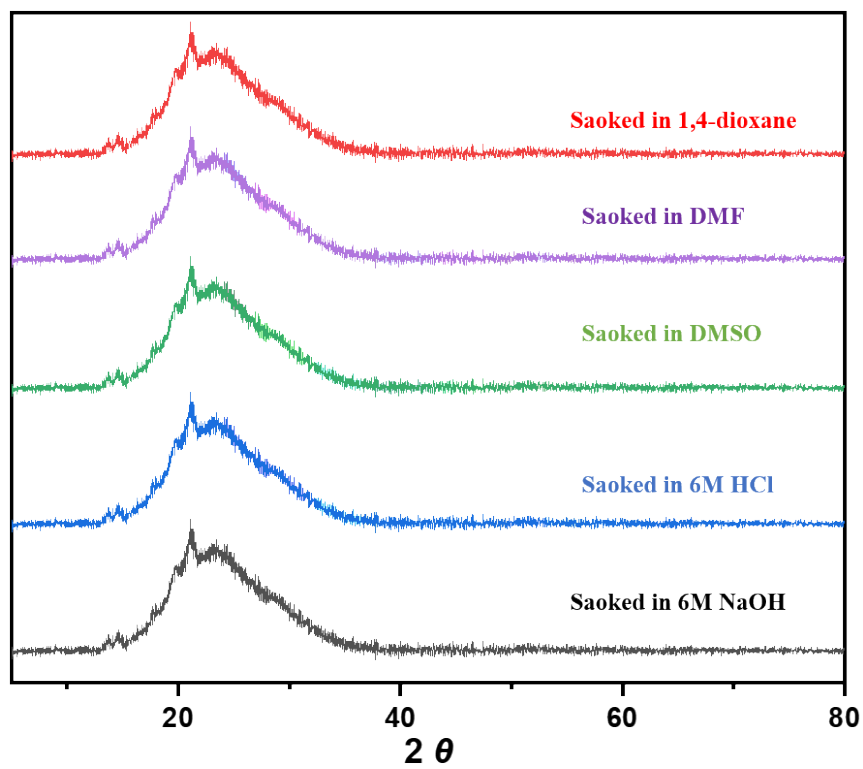

**Figure S10.** PXRD patterns of TzTPT-COF after soaking in different solvents.

## S8. Field Emission Scanning Electron Microscopy (FE-SEM)

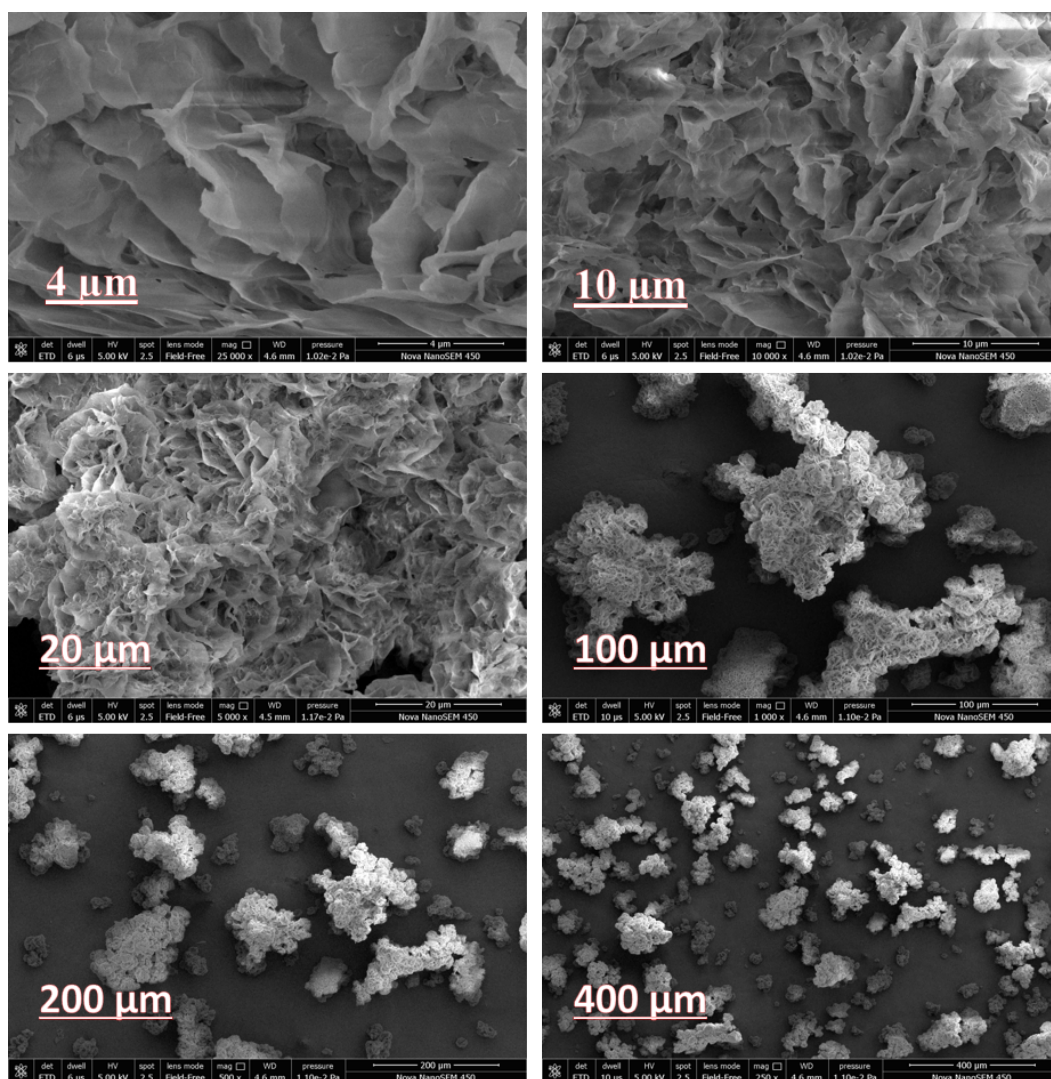

**Figure S11.** FE-SEM images of TzTPT-COF at different resolutions. Shows flaky morphology. At lower resolution, a fluffy cotton-like morphology can be seen. Whereas at higher resolution, the presence of aggregated-flakes can be seen.

## S9. High Resolution Transmission Electron Microscopy (HR-TEM)

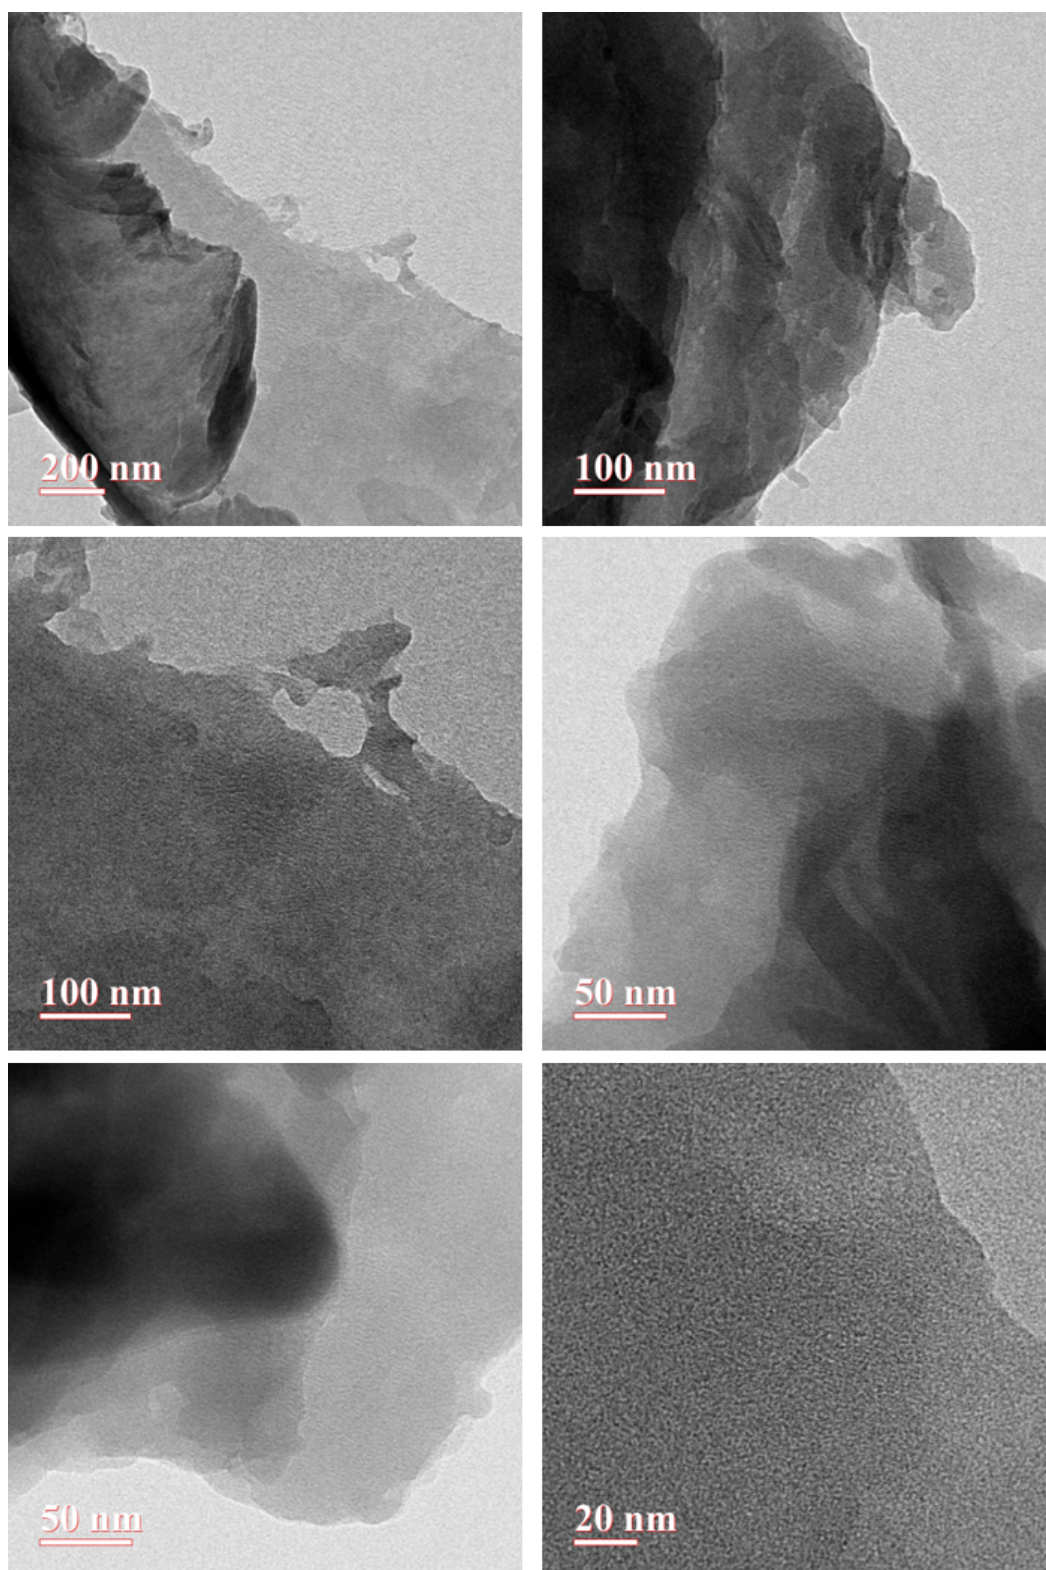

**Figure S12.** HR-TEM images of the TzTPT-COF under different magnifications showing the aggregates formed by stacking of many sheets. Darker regions are from such multi-flake

stacking. While at 20 nm resolution the uniform micropores all along the surface of the COF can be seen.

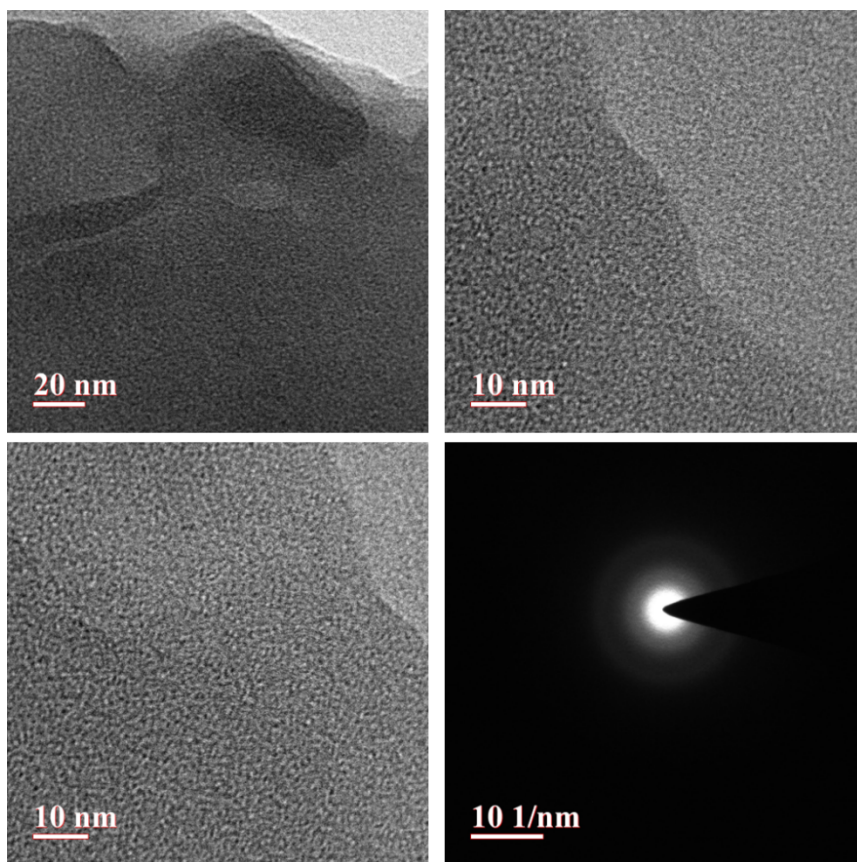

**Figure S13.** HR-TEM images of the TzTPT-COF under higher magnifications and SAED pattern of TzTPT-COF.

### S10. Dye Adsorption Study with TzTPT-COF

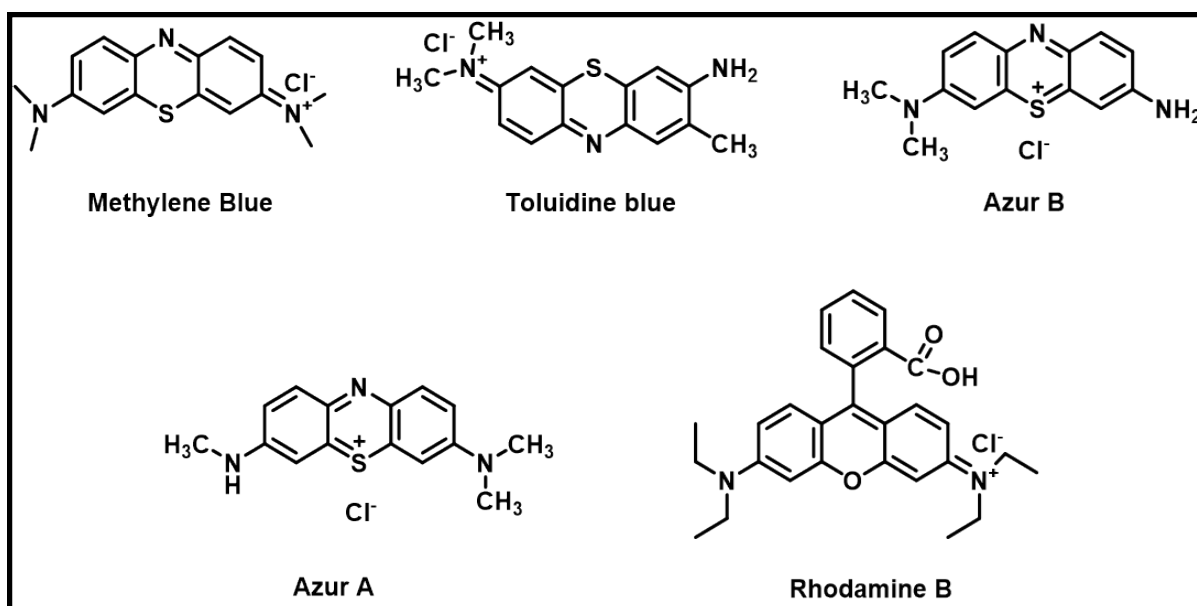

**Figure S14.** Chemical structures of the different dyes tested for adsorption with the TzTPT-COF.

Various organic dyes including Methylene Blue (MB), Azure A (AZA), Azure B (AZB), Toluidine blue O (TOLO), and Rhodamine B (RHB) were selected to study the adsorption ability of TzTPT-COF. In a typical experiment, an aqueous solution of MB, TOLO, RhB, AZA, and AZB (10 mL) was mixed with 5 mg of TzTPT-COF, and the mixture was then agitated at 500 rpm for 0-60 minutes. The UV-visible spectroscopy was used to measure the absorbance of dyes at the maximum absorbance wavelength for both before and after adsorption processes. Methylene blue (MB) aqueous dye concentrations (ranging from 10 to 600 mg L<sup>-1</sup>) were employed to create adsorption isothermal curves. In each experiment, (5 mg) of TzTPT-COF was added to a (10 ml) aqueous solution of MB in a glass vial. The mixture was then subjected to stirring at a rotational speed of (500 rpm) for a duration of 120 minutes. The isothermal curve was created by centrifuging the supernatant and recording its UV-Vis spectrum. The kinetic experiments of TzTPT-COF with MB were conducted to learn more about the adsorption characteristics of the substance. In this study, MB (300 mg L<sup>-1</sup>) at various time intervals from 5 to 150 minutes has been used. The reusability of TzTPT-COF for adsorption was evaluated by adding 5 mg of the material to a 10 mL aqueous solution containing 300 mg L<sup>-1</sup> of dye. The mixture was stirred for 1 hour and the supernatant was collected and analyzed using UV-Vis spectroscopy to determine the efficiency of adsorption. To remove the adsorbed dye, the exhausted TzTPT-COF was washed repeatedly with water, methanol, and acetone. The regenerated TzTPT-COF was utilised in the subsequent dye removal test after being dried overnight at 100 °C. For calculating the removal efficiency (%RE), adsorption amount  $Q_t$  (mg g<sup>-1</sup>), and equilibrium adsorption capacity  $Q_{eq}$  (mg g<sup>-1</sup>) of dyes, below given equations were used:<sup>3</sup>

$$Removal (\%) = \frac{C_0 - C_t}{C_0} \times V$$

$$Q_t = \frac{C_0 - C_t}{m} \times V$$

$$Q_{eq} = \frac{C_0 - C_{eq}}{m} \times V$$



Where  $C_0$ ,  $C_t$ , and  $C_e$  ( $\text{mg L}^{-1}$ ) are dye concentrations at the initial time, a given time  $t$ , and equilibrium in the solution, respectively.  $V$  (L) represents the volume of the solution, and  $m$  (g) is the mass of the adsorbent (g).

The empirical Freundlich model, which is recognised as being suitable for low concentrations, is stated by following equation:<sup>4</sup>

$$Q_{eq} = K_F C_e^{1/n}$$

where  $K_F$  ( $(\text{mg g}^{-1})/(\text{mg L}^{-1})^{1/n}$ ) is the Freundlich constant relating to adsorption capacity and  $n$  is the intensity. In order to determine the Freundlich constant, above Equation can be linearized to its logarithmic version as shown below.

$$\ln Q_{eq} = \ln K_F + \frac{1}{n} \ln C_{eq}$$

The following equation describes the Langmuir isotherms model:<sup>5</sup>

$$Q_{eq} = \frac{Q_m K_L C_{eq}}{1 + b C_{eq}}$$

where  $Q_m$  ( $\text{mg g}^{-1}$ ) is the maximum adsorption capacity, and  $K_L$  ( $\text{L mg}^{-1}$ ) is the Langmuir constant.

The following is an expression for the Langmuir equation's linear form:

$$\frac{C_{eq}}{Q_{eq}} = \frac{1}{K_L Q_m} + \frac{C_{eq}}{Q_m}$$

Regression coefficients ( $R^2$ ) and constants for the Langmuir and Freundlich isotherm models are compiled in Table S2.

The adsorption kinetic behaviour of TzTPT-COF over MB was estimated using two well-known adsorption models, the pseudo-first-order and pseudo-second-order kinetic models.<sup>6</sup>

The pseudo-first-order kinetics equation is given below:

$$\ln(Q_{eq} - Q_t) = \ln Q_{eq} - k_1 t$$

where  $Q_{eq}$  and  $Q_t$  are the adsorption capacity ( $\text{mg g}^{-1}$ ) at equilibrium and at a given time  $t$  (min), respectively, and  $k_1$  is the rate constant for the pseudo-first-order adsorption ( $\text{min}^{-1}$ ).

The pseudo-second-order kinetics equation is given below:

$$\frac{dQ_t}{dt} = k_2(Q_{eq} - Q_t)^2$$

$$\frac{t}{Q_t} = \frac{1}{k_2 Q_{eq}^2} + \frac{t}{Q_{eq}}$$

where  $k_2$  is the rate constant of pseudo-second-order adsorption ( $\text{g mg}^{-1} \text{min}^{-1}$ ).

The adsorption isotherm were studied for MB on TzTPT-COF at room temperature (RT), 40 °C, and 50 °C in the initial concentration range 10 to 600  $\text{mg L}^{-1}$  (Fig. S15). The adsorption capacity of methylene blue (MB) exhibited an upward trend as the initial concentration of MB increased, suggesting a favorable adsorption behavior of MB on the TzTPT-COF material, particularly at higher concentrations. In order to determine the maximum adsorption capacity of MB, the adsorption isotherms were analyzed and fitted using the Langmuir model. The plots of  $C_{eq}/Q_{eq}$  against  $C_{eq}$  gave good linear plots at all of the test initial concentrations, indicating the adsorption of MB follows the Langmuir model. With increasing temperature, the maximum adsorption capacity of MB on TzTPT-COF exhibited a notable enhancement from 398.434  $\text{mg g}^{-1}$  to 572.478  $\text{mg g}^{-1}$  (Table S4). This observation indicates the favorable nature of MB adsorption on TzTPT-COF, particularly at higher temperatures. Hence, this novel amorphous TzTPT-COF adsorbent can be strongly recommended as an efficient alternative for the removal of dyes. The adsorbed amount  $Q_t$  on TzTPT-COF vs. time for various initial dye concentrations (50, 100, and 300  $\text{mg L}^{-1}$ ) are shown in Fig. S16. The adsorption kinetics of the dye demonstrate a rapid initial uptake at varying concentrations, which progressively diminishes over time until reaching a state of equilibrium. The initial stage of adsorption exhibited a higher rate attributed to the greater abundance of active sites on the TzTPT-CHO surface. Nevertheless, as the process advanced, these active sites became progressively occupied by the dye molecules, leading to a reduction in available adsorptive sites for the remaining dye molecules in the solution. The findings further demonstrated a direct correlation between the initial dye concentration and the amount of dye adsorbed onto TzTPT-COF. Specifically, the equilibrium adsorbed quantity of dye onto TzTPT-COF increased from 106.0796  $\text{mg g}^{-1}$  to 385.9453  $\text{mg g}^{-1}$  as the initial concentrations of MB increased from 50  $\text{mg L}^{-1}$  to 300  $\text{mg L}^{-1}$ . The plots of  $t/Q_t$  versus time for various initial dye concentrations exhibit a remarkable linear relationship, as depicted in Fig. S16. The outcomes reveal that the pseudo second-order kinetic model provides a superior fit to the experimental data, as evidenced by the linear regression coefficients of 0.999 ( $R^2 > 0.999$ ) observed across all initial dye concentrations (Table S5). UV-Vis spectra of an aqueous MB solution (initial concentration: 10  $\text{mg L}^{-1}$ ) after 30 minutes after the addition of the (a) Tz, (b) TPT-CHO and (c) Mixture of Tz and TPT-CHO as illustrated in Fig. S17. MB adsorption capability of TZ, TPT-CHO and their physical mixture is very less or almost negligible. In case of TPT-CHO the adsorption capability is 7.24%, in case of Tz the adsorption capability is 13.58% and in case of mixture the adsorption capability is 10.78 %. In comparison to other reported adsorbent polymers such as OMC, MOFs, CMPs, as well as various natural adsorbents listed in Table S9, the adsorption capacity of amorphous

TzTPT-COF for MB demonstrates its remarkable potential as one of the most promising adsorbent. Several comparison plots between adsorption capacity of TzTPT-COF with other reported adsorbents polymers such as OMC, MOFs, CMPs as well as various natural adsorbent exhibited in Fig. S26, S27, S28 and S29. These plots serve as a scientific basis for assessing the effectiveness of TzTPT-COF in comparison to other materials for adsorption purposes. As shown in Fig.3, both MB and RhB are of cations dyes, while MB has been removed very quickly and RhB was there almost with no variation after 1 hour. To understand the reason kinetic study of RhB was conducted at different initial concentration mentioned in Fig. S18 and Table S6 and computational simulations were employed to complement the experimental findings. To get a better insight of the adsorption behaviour of the two cationic dyes MB and RhB, the Energy decomposition Analysis has been done which gives the total interaction between the fragments (Dye and COF) in terms of interaction energy.

The interaction energy is further decomposed into various contributions,

$$\Delta E_{\text{int}} = \Delta E_{\text{elst}} + \Delta E_{\text{Pauli}} + \Delta E_{\text{orb}} + \Delta E_{\text{disp}}$$

where, the term  $\Delta E_{\text{elst}}$  corresponds to the electrostatic interaction (attractive in nature),  $\Delta E_{\text{Pauli}}$  refers to the Pauli repulsion energy,  $\Delta E_{\text{orbital}}$  accounts for orbital interactions resulting from electron pair bonding, charge transfer and polarization terms, and  $\Delta E_{\text{disp}}$  represents the dispersion interaction terms.

From the EDA analysis values mentioned in Table S7, it can be concluded that between the two dyes MB and RhB, the  $\Delta E_{\text{int}}$  value is higher (~2.27 times) for MB@ TzTPT-COF as compared to the RhB@ TzTPT-COF. The  $\Delta E_{\text{orb}(1)}$  value for MB@ TzTPT-COF is also comparatively larger than RhB@ TzTPT-COF which can be clearly seen in Fig. S19. Moreover, the two bulky ethyl (-CH<sub>2</sub>CH<sub>3</sub>) groups on N and extra benzene ring with -COOH group of RhB might cause some steric hindrance for the RhB dye to come in direct contact with the TzTPT-COF, whereas MB has comparatively smaller methyl groups on N as evidenced via the NOCV difference density plots shown in Fig. S19.

**Table S2.** Isotherm parameters for the adsorption of MB on TzTPT-COF.

| Adsorbent | Langmuir (linear)  |         |         | Freundlich (linear) |           |         |
|-----------|--------------------|---------|---------|---------------------|-----------|---------|
|           | $Q_{\text{max}}$   | $K_L$   | $R_L^2$ | $K_F$               | $n$       | $R_F^2$ |
| TzTPT-COF | 398.434            | 0.15829 | 0.9986  | 90.85753            | 3.5504556 | 0.7206  |
|           | mg g <sup>-1</sup> |         |         |                     |           |         |

**Table S3.** Kinetic parameters for the adsorption of MB on TzTPT-COF.

| Initial concentration  | Pseudo-first-order kinetic model |                               |        | Pseudo-second-order kinetic model             |                               |        |
|------------------------|----------------------------------|-------------------------------|--------|-----------------------------------------------|-------------------------------|--------|
|                        | $k_1$ (1/h)                      | $Q_e$ , (mg g <sup>-1</sup> ) | $R^2$  | $k_2$ (g mg <sup>-1</sup> min <sup>-1</sup> ) | $Q_e$ , (mg g <sup>-1</sup> ) | $R^2$  |
| 300 mg L <sup>-1</sup> | 0.001008667                      | 3.7831E-158                   | 0.8846 | 0.000599                                      | 385.9453                      | 0.9997 |

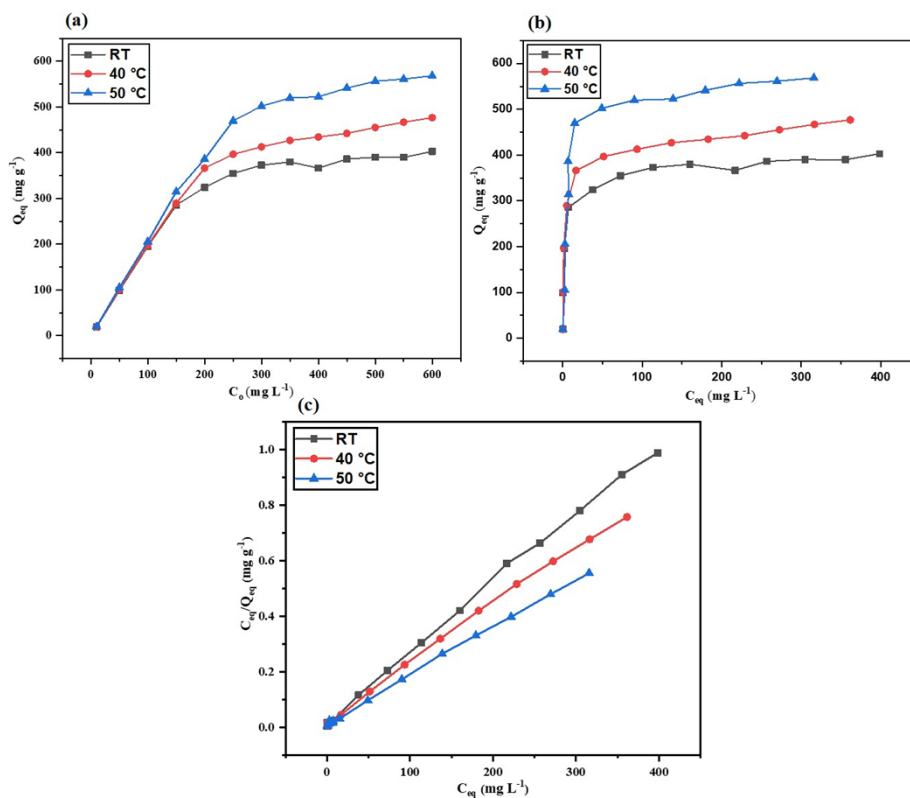

**Figure S15.** The adsorption isotherm for MB on TzTPT-COF (a)  $Q_{eq}$  vs  $C_o$ , (b)  $Q_{eq}$  vs  $C_{eq}$  at room temperature (RT), 40 °C, and 50 °C, and the corresponding Langmuir plot for MB (c).

**Table S4.** Isotherm parameters for the adsorption of MB on TzTPT-COF at different temperatures.

| Adsorbent | Temperature | Langmuir (linear)          |         |         |
|-----------|-------------|----------------------------|---------|---------|
|           |             | $Q_{max}$                  | $K_L$   | $R_L^2$ |
| TzTPT-COF | RT          | 398.434 mg g <sup>-1</sup> | 0.15829 | 0.9986  |
|           | 40 °C       | 471.634 mg g <sup>-1</sup> | 0.13542 | 0.9978  |
|           | 50 °C       | 572.478 mg g <sup>-1</sup> | 0.15121 | 0.999   |

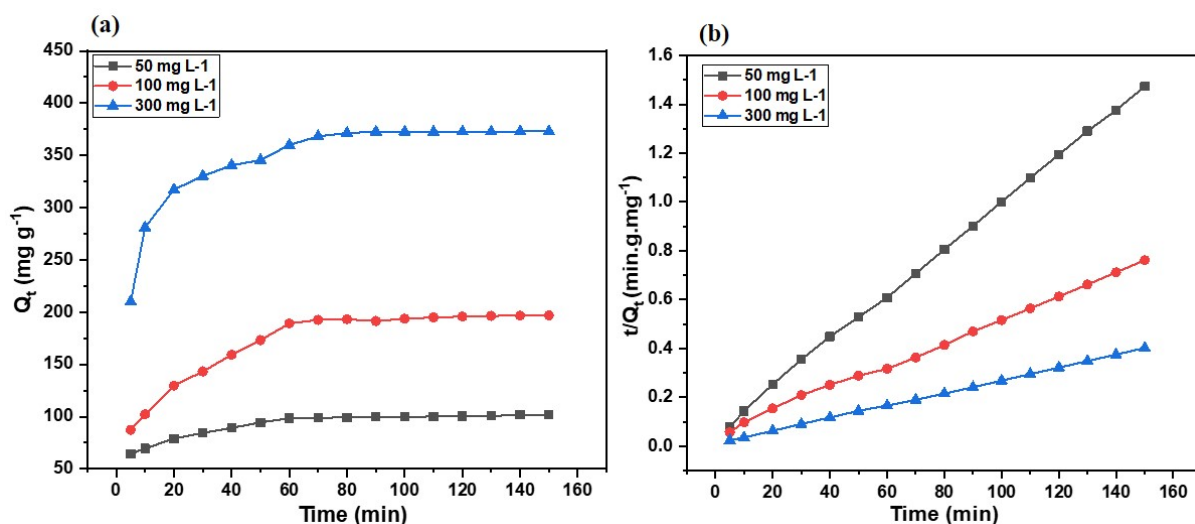

**Figure S16.** (a) Pseudo-second-order kinetic model plots for the adsorption of MB on TzTPT-COF at different initial concentrations, (b) Fitting curve of adsorption on MB through Pseudo-second-order kinetic model.

**Table S5.** Kinetic parameters for the adsorption of MB on TzTPT-COF at different initial concentrations.

| Initial concentration  | Pseudo-second-order kinetic model             |                             |        |
|------------------------|-----------------------------------------------|-----------------------------|--------|
|                        | $k_2$ (g mg <sup>-1</sup> min <sup>-1</sup> ) | $Q_e$ (mg g <sup>-1</sup> ) | $R^2$  |
| 50 mg L <sup>-1</sup>  | 0.001524                                      | 106.0796                    | 0.9996 |
| 100 mg L <sup>-1</sup> | 0.000402                                      | 214.8177                    | 0.9979 |
| 300 mg L <sup>-1</sup> | 0.000599                                      | 385.9453                    | 0.9997 |

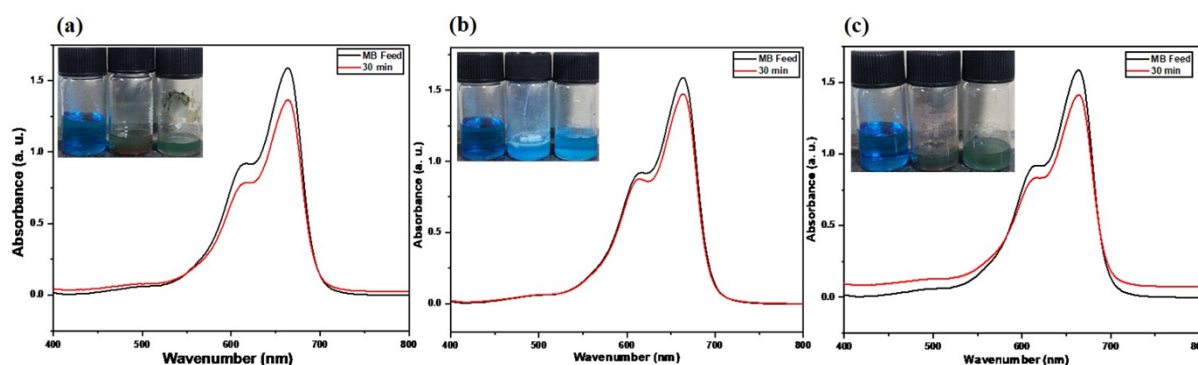

**Figure S17.** UV-Vis spectra of an aqueous MB solution (initial concentration: 10 mg L<sup>-1</sup>) after 30 minutes after the addition of the (a) Tz, (b) TPT-CHO and (c) Mixture of Tz and TPT-CHO.

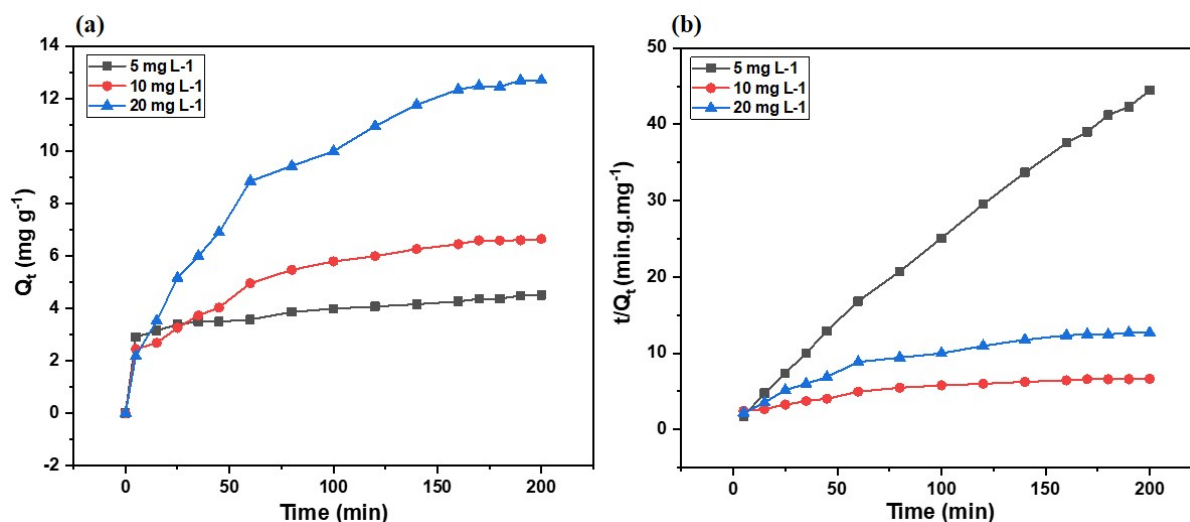

**Figure S18.** (a) Pseudo-second-order kinetic model plots for the adsorption of RhB on TzTPT-COF at different initial concentrations, (b) Fitting curve of adsorption on RhB through Pseudo-second-order kinetic model.

**Table S6.** Kinetic parameters for the adsorption of RhB on TzTPT-COF at different initial concentrations.

| Initial concentration | Pseudo-second-order kinetic model             |                             |        |
|-----------------------|-----------------------------------------------|-----------------------------|--------|
|                       | $k_2$ (g mg <sup>-1</sup> min <sup>-1</sup> ) | $Q_e$ (mg g <sup>-1</sup> ) | $R^2$  |
| 5 mg L <sup>-1</sup>  | 0.018767                                      | 4.62361                     | 0.9954 |
| 10 mg L <sup>-1</sup> | 0.00448                                       | 7.59681                     | 0.9914 |
| 20 mg L <sup>-1</sup> | 0.001227                                      | 15.9487                     | 0.9902 |

**Table S7.** EDA-NOCV energies computed at PBE-D3BJ/TZP level of the theory for MB and RhB dyes adsorbed on TzTPT-COF. All the values are in kcal/mol.

| Energy                     | MB     | RhB   |
|----------------------------|--------|-------|
| $\Delta E_{\text{int}}$    | -19.72 | -8.68 |
| $\Delta E_{\text{Pauli}}$  | 12.93  | 5.11  |
| $\Delta E_{\text{disp}}$   | -12.55 | -7.18 |
| $\Delta E_{\text{elstat}}$ | -11.37 | -3.63 |
| $\Delta E_{\text{orb}}$    | -8.73  | -2.98 |

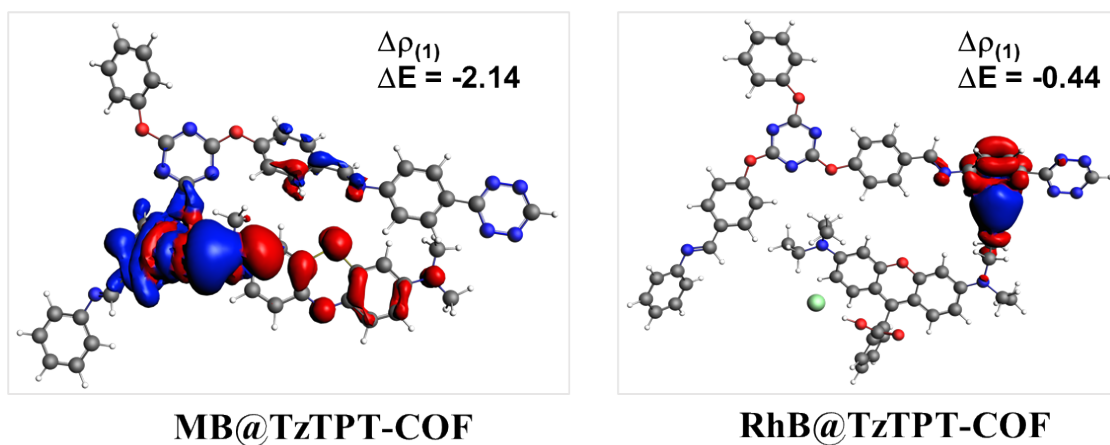

**Figure S19.** Plot of electron deformation densities (EDD) corresponding to the highest interaction  $\Delta E_{orb(1)}$  for MB@ TzTPT-COF and RhB@TzTPT-COF.

### S11. Reusability test

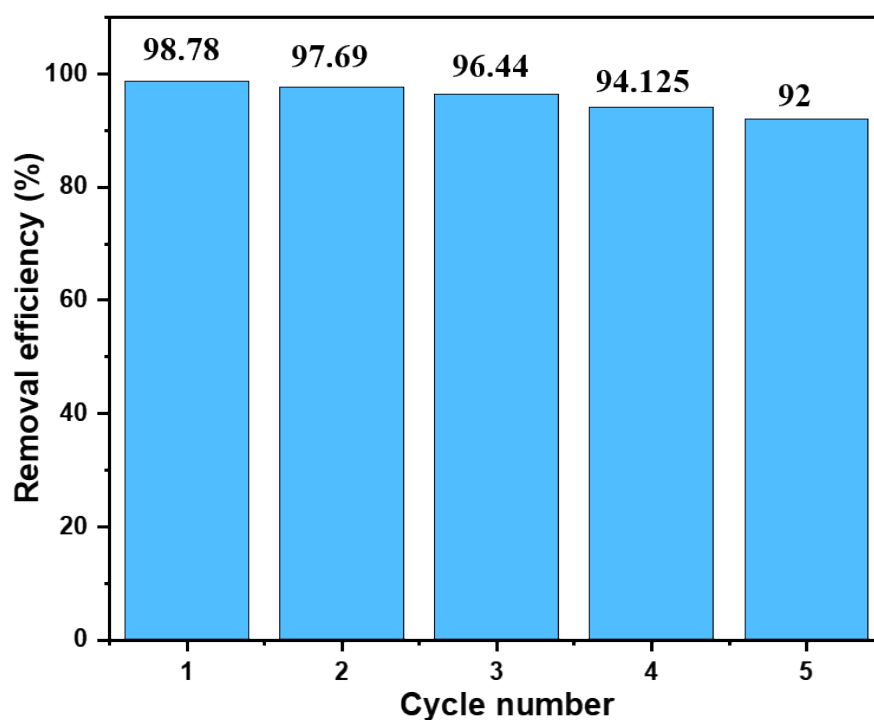

**Figure S20.** Reusability of the TzTPT-COF for the removal of MB within 20 min.

## S12. Chemical stability of TzTPT-COF

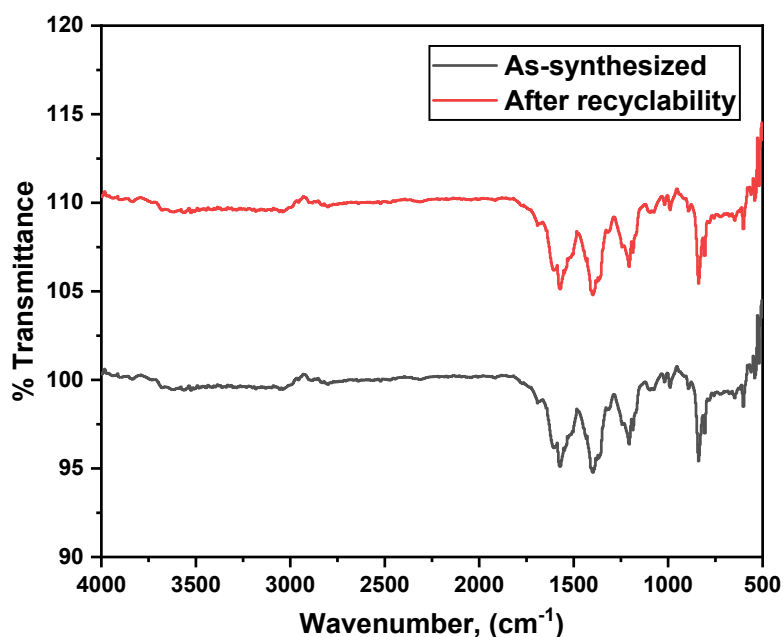

**Figure S21.** FT-IR spectra of TzTPT-COF as-synthesized, after recyclability from dye experiments.

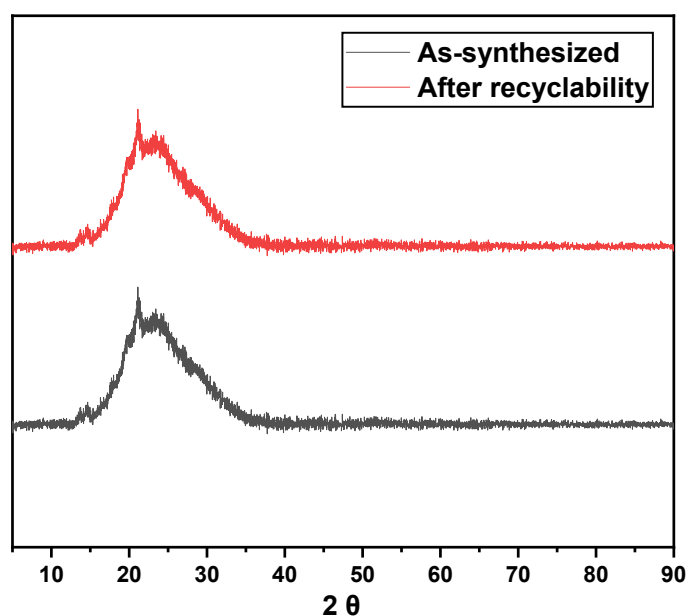

**Figure S22.** PXRD spectra of TzTPT-COF as-synthesized, after recyclability from dye experiments.

## S13. Modeling and Theoretical Simulations

All calculations have been performed using the density functional theory (DFT) in a periodic framework, as implemented in VASP 5.4.4. The projector augmented wave (PAW) method was used to describe the frozen core electrons and their interaction with the valence electrons.



The electronic wave function was expanded in plane waves up to a cutoff energy of 520 eV. Gamma-centred  $2 \times 2 \times 1$  k-points were used in the Brillouin zone corresponding to the primitive cell. The Perdew–Burke–Ernzerhof functional (PBE) has been used along with the dispersion interactions (DFT-D3) proposed by Grimme et al.<sup>7</sup>

Presence of a lot of aromatic rings and typically cationic nature of dyes with planar structure, they bound together  $\pi$ - $\pi$  stacking interactions. COF acts as electron-donating Lewis base, whereas the cationic dye is viewed as a Lewis acid due to the fact that COF contains a significant quantity of electron-rich atoms like N and O (carrying a lone pair of electrons). Hence, these N and O atoms can draw cationic dye molecules during the adsorption process, in accordance with the Lewis acid-base reaction theory which is evident from the charge difference density plot. The adsorption process also results in changes in the structure of MB molecule from a curved geometry to a somewhat linear form, showing a stronger electrostatic interaction (Fig. 7).

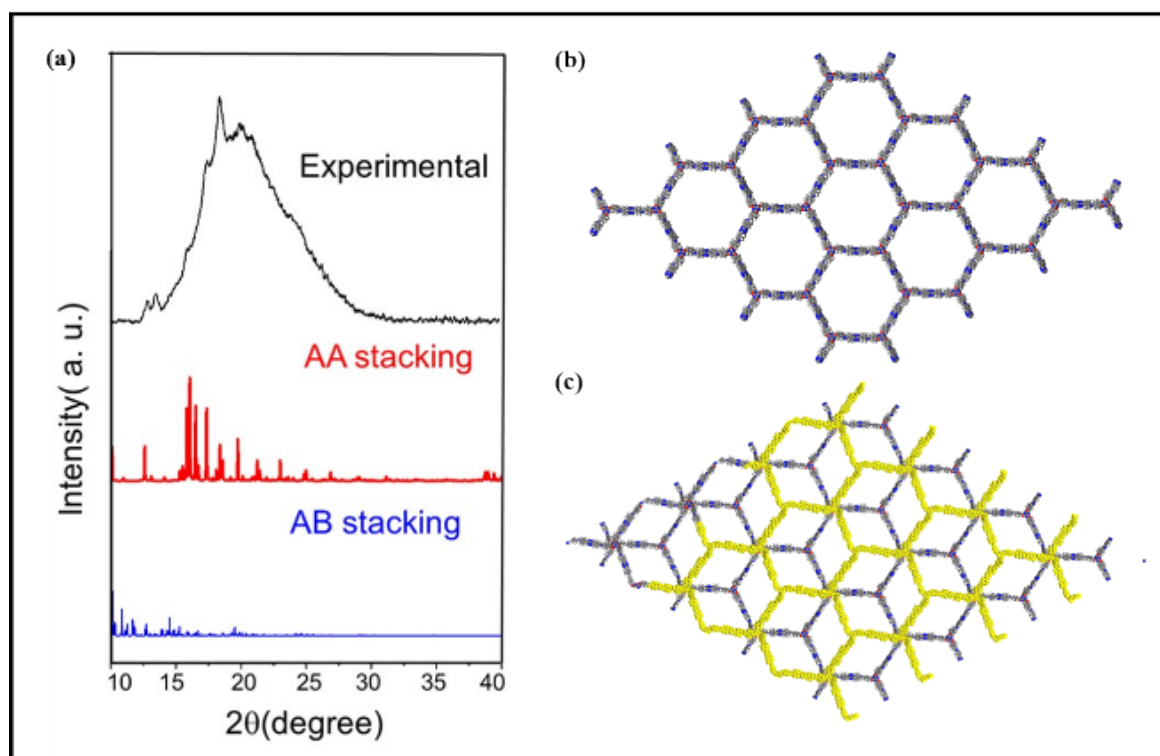

**Figure S23.** (a) Powder X-ray diffraction study of TzTPT-COF. Experimental (black line), simulated AA-stacking model (red line) and AB-stacking model (blue line). (b) eclipsed AA-stacking model. (c) Staggered AB-stacking model.

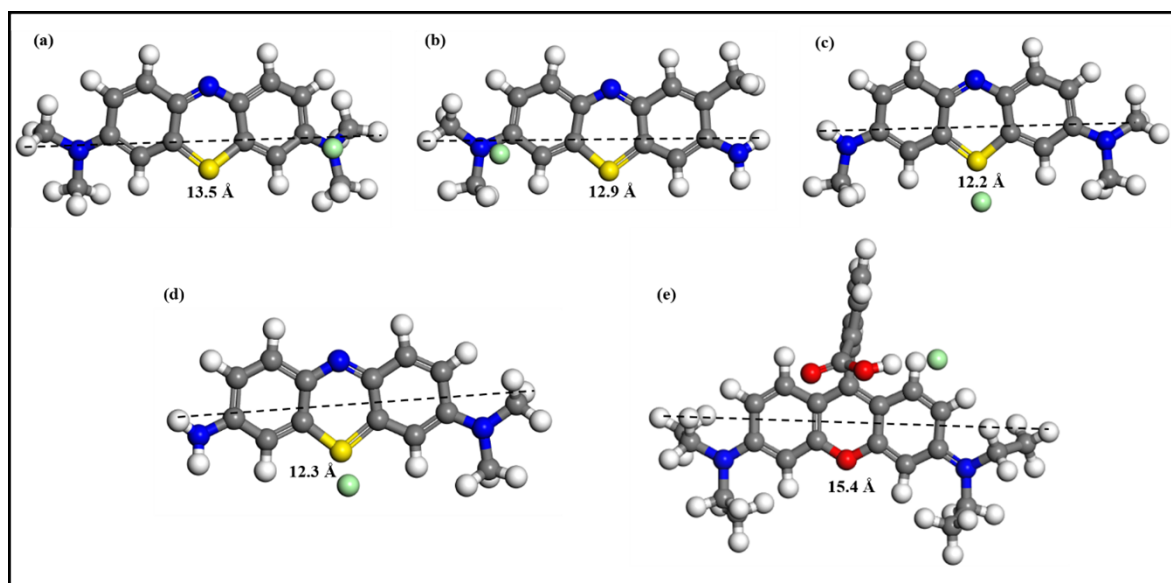

**Figure S24.** DFT-optimized structures of dyes (a) MB, (b) TOLO, (c) AZA, (d) AZB, (e) RhB. Color codes: C (grey); H (white); N (blue); O (red); Cl (green); S (yellow).

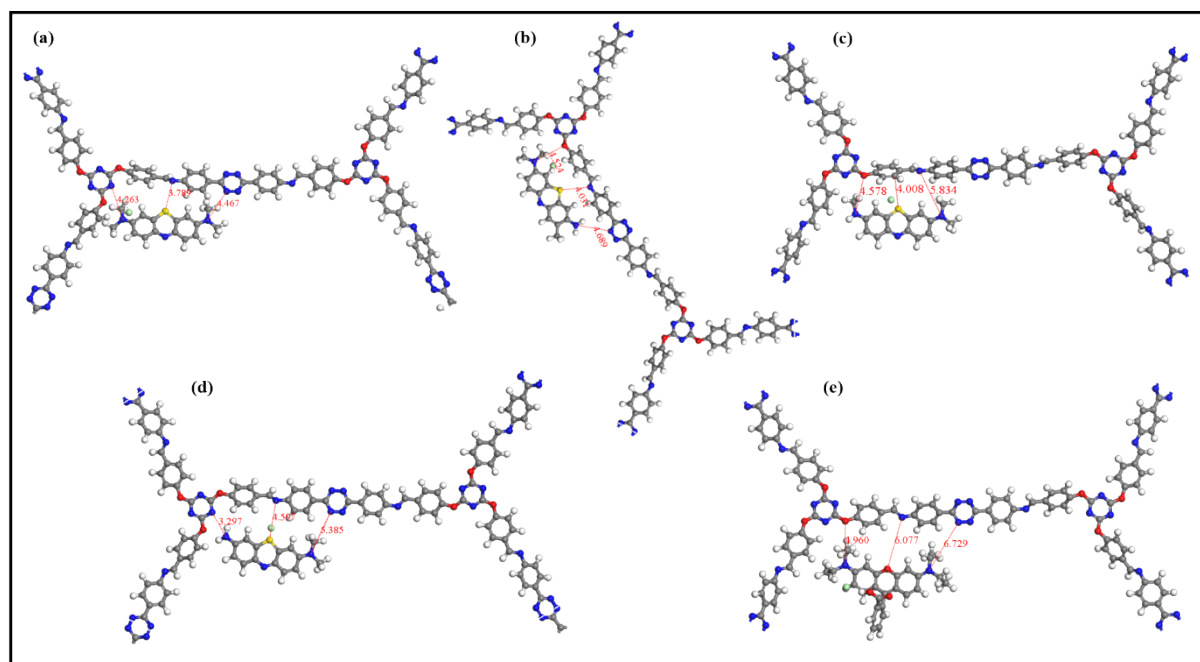

**Figure S25.** DFT-optimized structures of respective dyes absorbed on TzTPT-COF (a) MB (b) TOLO (c) AZA (d) AZB (e) RhB. Color codes: C (grey); H (white); N (blue); O (red); Cl (green); S (yellow).

**Table S8:** Cartesian atomic coordinates for the smallest unit cell of TzTPT-COF.

| <b>Space group: P6(C6-1)</b>                              |                  |                 |                |
|-----------------------------------------------------------|------------------|-----------------|----------------|
| a = 53.575702 Å b = 53.575702 Å c = 6.9372 Å              |                  |                 |                |
| $\alpha = 90^\circ, \beta = 90^\circ, \gamma = 120^\circ$ |                  |                 |                |
| N                                                         | 27.472011689000  | 15.849528524242 | 3.327081120000 |
| N                                                         | 25.360593352000  | 14.740618302552 | 3.100442796000 |
| N                                                         | 25.442028416000  | 17.113407789466 | 3.251951244000 |
| N                                                         | 13.566974511000  | 23.997930747391 | 2.738598444000 |
| N                                                         | 12.346520065000  | 21.985189098147 | 3.159062136000 |
| N                                                         | 12.438670269000  | 24.679980130606 | 2.743315740000 |
| N                                                         | 11.226520056500  | 22.665846543846 | 3.178902528000 |
| N                                                         | 6.378990720500   | 26.854650510967 | 3.400962300000 |
| N                                                         | 18.152250795500  | 19.418920296403 | 3.033776304000 |
| N                                                         | 39.462789106000  | 22.465871520604 | 4.850420868000 |
| N                                                         | 38.192509259000  | 24.417367919109 | 4.344074640000 |
| N                                                         | 33.651432927000  | 19.855524697495 | 3.884693256000 |
| N                                                         | 25.126199664500  | 1.036993449991  | 3.019693788000 |
| N                                                         | 27.064836369000  | 0.971572386703  | 1.636138620000 |
| N                                                         | 26.881339596500  | 7.273801483447  | 2.693090412000 |
| N                                                         | -0.062147812000  | 30.171637613420 | 3.538041372000 |
| N                                                         | -2.156957682000  | 31.325089835647 | 3.593677716000 |
| N                                                         | -0.131528343500  | 32.543963121162 | 3.241267956000 |
| N                                                         | -14.278727685500 | 25.135143698589 | 4.351844304000 |
| N                                                         | -13.012733894500 | 23.186431175116 | 4.879348992000 |
| N                                                         | -8.261372940000  | 27.452719664004 | 4.020246144000 |
| N                                                         | -1.691116970500  | 46.118137784664 | 3.034608768000 |
| N                                                         | 0.245644584500   | 46.057820492271 | 1.648556208000 |
| N                                                         | -0.411193497500  | 39.775542499933 | 2.826284652000 |
| C                                                         | 26.683913142000  | 14.756393594409 | 3.202350264000 |
| C                                                         | 26.779813645000  | 16.982565662890 | 3.344007888000 |
| C                                                         | 24.800727287000  | 15.961811483928 | 3.134712564000 |
| C                                                         | 28.685501294000  | 18.570302390348 | 3.570784956000 |
| C                                                         | 28.802564198500  | 19.958992052908 | 3.705366636000 |
| C                                                         | 29.818091592000  | 17.744419463733 | 3.549071520000 |
| C                                                         | 30.056235578500  | 20.530614393127 | 3.830999328000 |
| C                                                         | 31.075245392500  | 18.341560658426 | 3.665408364000 |
| C                                                         | 31.216149483500  | 19.734426133536 | 3.811158936000 |
| C                                                         | 32.496072956500  | 20.418331433441 | 3.956354532000 |
| C                                                         | 22.559387877500  | 16.973750058617 | 3.056738436000 |
| C                                                         | 21.236335966000  | 16.545497282625 | 2.864855484000 |
| C                                                         | 22.854054227500  | 18.325785366569 | 3.261455208000 |
| C                                                         | 20.202860713000  | 17.463248085346 | 2.888788824000 |

|   |                 |                 |                |
|---|-----------------|-----------------|----------------|
| C | 21.796202031000 | 19.237504440051 | 3.285180432000 |
| C | 20.466185278500 | 18.830594705983 | 3.107171880000 |
| C | 19.372705241500 | 19.794743425930 | 3.177792576000 |
| C | 26.891518979500 | 12.308903460762 | 3.083793516000 |
| C | 25.562573741000 | 11.897353934971 | 3.234608244000 |
| C | 27.909725158000 | 11.373985428667 | 2.845570068000 |
| C | 25.275407989000 | 10.533255168541 | 3.135406284000 |
| C | 27.607558210000 | 10.026589912438 | 2.760034392000 |
| C | 26.278880850000 | 9.580241948728  | 2.905368732000 |
| C | 25.955283622000 | 8.157681806593  | 2.816850060000 |
| C | 13.510720026000 | 22.670950314740 | 3.007137456000 |
| C | 11.291882410500 | 24.014170018420 | 3.030723936000 |
| C | 10.037407395000 | 24.767208214990 | 3.124168020000 |
| C | 8.803826902500  | 24.086550769291 | 3.171549096000 |
| C | 10.040889815500 | 26.172601127751 | 3.191736348000 |
| C | 7.612571213000  | 24.788551256914 | 3.270959172000 |
| C | 8.847223219500  | 26.875993552891 | 3.288649032000 |
| C | 7.609356671000  | 26.196264065536 | 3.305853288000 |
| C | 14.752872630500 | 21.895641117902 | 3.064438728000 |
| C | 14.726084780500 | 20.588147810486 | 3.588474816000 |
| C | 15.962879815000 | 22.403698311521 | 2.555178876000 |
| C | 15.867782947500 | 19.805878926064 | 3.579664572000 |
| C | 17.111007066000 | 21.618645552065 | 2.549837232000 |
| C | 17.079665281500 | 20.304192557066 | 3.063606264000 |
| C | 38.310375799000 | 23.069972402880 | 4.469291100000 |
| C | 37.112691025500 | 22.241769580404 | 4.294959264000 |
| C | 36.006888577500 | 22.733587502995 | 3.577583412000 |
| C | 37.053221998500 | 20.937988106367 | 4.826626272000 |
| C | 34.868404952500 | 21.954102493606 | 3.413657376000 |
| C | 35.913131102500 | 20.161286972011 | 4.668596856000 |
| C | 34.789648673500 | 20.665168353081 | 3.985698888000 |
| C | 26.178426412500 | 1.643878207301  | 2.415116808000 |
| C | 26.315848083000 | 3.101236787355  | 2.502664272000 |
| C | 25.429706005000 | 3.878865880055  | 3.273664680000 |
| C | 27.367806952500 | 3.745703857617  | 1.820598768000 |
| C | 25.577574937000 | 5.260595855031  | 3.347268372000 |
| C | 27.523444361000 | 5.119546186665  | 1.905579468000 |
| C | 26.622301087000 | 5.906454862810  | 2.650357260000 |
| C | -1.403415461500 | 30.234274801675 | 3.664922760000 |
| C | 0.499861281000  | 31.356640419360 | 3.332422764000 |
| C | -1.448151171000 | 32.449775349194 | 3.370161132000 |
| C | 2.801473353000  | 30.494567117310 | 3.097043568000 |

|   |                  |                 |                |
|---|------------------|-----------------|----------------|
| C | 3.955493931000   | 30.935347330953 | 2.440576332000 |
| C | 2.732092821500   | 29.208880830990 | 3.651880824000 |
| C | 5.048438211000   | 30.088121362414 | 2.333119104000 |
| C | 3.847003138500   | 28.377430154309 | 3.550250844000 |
| C | 5.018971576000   | 28.800115180233 | 2.897529696000 |
| C | 6.219067256000   | 27.977016128652 | 2.792292372000 |
| C | -3.286333438000  | 28.685048345514 | 4.050769824000 |
| C | -4.392671643000  | 29.413495645955 | 3.588405444000 |
| C | -3.452418108000  | 27.440656205525 | 4.667764392000 |
| C | -5.665630275000  | 28.865072264349 | 3.741231960000 |
| C | -4.728591282000  | 26.917287699221 | 4.823782020000 |
| C | -5.857431281000  | 27.613256457604 | 4.353370488000 |
| C | -7.165481996500  | 26.981780804165 | 4.503838356000 |
| C | -13.097115622000 | 24.489748669981 | 4.504323960000 |
| C | -11.852016354000 | 25.252530429169 | 4.368354840000 |
| C | -10.637455235000 | 24.580688587743 | 4.135750524000 |
| C | -11.844247877500 | 26.658851300275 | 4.453266168000 |
| C | -9.450753480000  | 25.290576721294 | 4.007759184000 |
| C | -10.656474608500 | 27.367811475481 | 4.333738212000 |
| C | -9.434412891500  | 26.696897592400 | 4.133946852000 |
| C | -1.879435556000  | 34.863395003266 | 3.070474092000 |
| C | -0.622281755500  | 35.440121114380 | 3.304465848000 |
| C | -2.966486509000  | 35.649375721067 | 2.673250020000 |
| C | -0.479234636500  | 36.819067214322 | 3.148586964000 |
| C | -2.804152138000  | 37.018114279220 | 2.518689204000 |
| C | -1.561463776500  | 37.630102807425 | 2.761907436000 |
| C | -1.475206899500  | 39.081429658240 | 2.623302180000 |
| C | -0.670499885500  | 45.447223901583 | 2.443420584000 |
| C | -0.610227223000  | 43.987081446495 | 2.566347768000 |
| C | 0.457000721000   | 43.266985771155 | 1.989935820000 |
| C | -1.604592215000  | 43.278121271289 | 3.265201296000 |
| C | 0.523970346000   | 41.885255796179 | 2.101347252000 |
| C | -1.551284393500  | 41.892215483762 | 3.356147988000 |
| C | -0.496110982000  | 41.169799912561 | 2.757814488000 |
| O | 27.393255410000  | 13.613148913972 | 3.181885524000 |
| O | 27.352269999500  | 18.194015281649 | 3.466033236000 |
| O | 23.458388123500  | 15.905670004085 | 3.032666352000 |
| O | -1.938100947500  | 29.019577328710 | 3.899885724000 |
| O | 1.830949547500   | 31.495370191865 | 3.176751996000 |
| O | -2.247500615000  | 33.528990903860 | 3.259165932000 |
| H | 27.894456083500  | 20.560309060151 | 3.710430792000 |
| H | 29.709868678000  | 16.667987784101 | 3.448898352000 |

|   |                  |                 |                |
|---|------------------|-----------------|----------------|
| H | 30.148921539500  | 21.612613822826 | 3.940745832000 |
| H | 31.973977760000  | 17.723076421809 | 3.653545752000 |
| H | 21.049088894500  | 15.483448957333 | 2.708213508000 |
| H | 23.878421611500  | 18.652426703837 | 3.399366744000 |
| H | 19.169117581500  | 17.148206227385 | 2.752958448000 |
| H | 22.017469672000  | 20.294448994449 | 3.451811976000 |
| H | 24.773135801500  | 12.618841547828 | 3.409286940000 |
| H | 28.932217392500  | 11.733569287165 | 2.733395544000 |
| H | 24.238450315500  | 10.206149852101 | 3.247233948000 |
| H | 28.386548888000  | 9.287935070207  | 2.575296756000 |
| H | 19.648084339500  | 20.844264313571 | 3.396869352000 |
| H | 24.880555080000  | 7.892285720063  | 2.840991516000 |
| H | 32.409548201000  | 21.503578717346 | 4.158435168000 |
| H | 8.802755388500   | 22.998055631180 | 3.129995268000 |
| H | 10.994269397000  | 26.701073404950 | 3.178208808000 |
| H | 6.657316482000   | 24.265182750610 | 3.307240728000 |
| H | 8.867314107000   | 27.962168795140 | 3.385145484000 |
| H | 13.788242152000  | 20.193301534897 | 3.976056180000 |
| H | 15.980559796000  | 23.410533115315 | 2.137628808000 |
| H | 15.853585387000  | 18.785588726274 | 3.963222360000 |
| H | 18.029026685500  | 22.003284285865 | 2.102457204000 |
| H | 36.056446100000  | 23.732534660861 | 3.143661552000 |
| H | 37.912844105000  | 20.550565497533 | 5.371265844000 |
| H | 34.036642210000  | 22.331317560649 | 2.817196920000 |
| H | 35.857412374500  | 19.158164001595 | 5.090517360000 |
| H | 24.625802626500  | 3.381016228225  | 3.816361836000 |
| H | 28.063487417000  | 3.145778787891  | 1.236625272000 |
| H | 24.900913846000  | 5.843353695384  | 3.974391252000 |
| H | 28.345831356000  | 5.623427567735  | 1.397984544000 |
| H | 3.973441790500   | 31.944502030608 | 2.031073416000 |
| H | 1.822645314000   | 28.867856139383 | 4.137901056000 |
| H | 5.950385120500   | 30.431001970711 | 1.821708720000 |
| H | 3.819947410000   | 27.374771163065 | 3.978067968000 |
| H | 7.011183980500   | 28.387637696098 | 2.137281948000 |
| H | -4.257393000500  | 30.389243845208 | 3.131937684000 |
| H | -2.569490572000  | 26.899656490676 | 5.004218592000 |
| H | -6.539985699000  | 29.410711770921 | 3.382925580000 |
| H | -4.856905083500  | 25.943395416657 | 5.300159544000 |
| H | -7.158249277000  | 26.034799313592 | 5.077406052000 |
| H | -10.641473412500 | 23.494513345494 | 4.043138904000 |
| H | -12.785037169500 | 27.182219806579 | 4.623643800000 |
| H | -8.526572655000  | 24.758856589889 | 3.775571100000 |

|   |                  |                 |                |
|---|------------------|-----------------|----------------|
| H | -10.645491590000 | 28.454914676075 | 4.412336688000 |
| H | 0.222339155000   | 34.822564836108 | 3.594163320000 |
| H | -3.928706081000  | 35.166837381921 | 2.505855384000 |
| H | 0.487538870000   | 37.290006074162 | 3.332492136000 |
| H | -3.655470011000  | 37.631494744942 | 2.216019168000 |
| H | -2.417335584000  | 39.573711560002 | 2.315290500000 |
| H | 1.232241100000   | 43.814481194416 | 1.455216444000 |
| H | -2.421353761500  | 43.831648423790 | 3.728259396000 |
| H | 1.353590060500   | 41.329872726989 | 1.663193700000 |
| H | -2.316613268000  | 41.354463623118 | 3.917506212000 |

#### S14. Comparison study of MB adsorption on different adsorbents

**Table S9:** Comparison of the maximum equilibrium adsorption capacity of the MB dye on different adsorbents at room temperature.

| Porous adsorbents                   | SBET<br>(m <sup>2</sup> /g) | Nature           | Adsorption<br>capacity (mg/g) | Ref.      |
|-------------------------------------|-----------------------------|------------------|-------------------------------|-----------|
|                                     |                             |                  | MB                            |           |
| TzTPT-COF                           | 131                         | Amorphous        | 398.434                       | This work |
| Raw zeolite                         | 24.59                       | Semi-crystalline | 6.1                           | 8         |
| Raw kaolin                          | 9.65                        | nm               | 13.99                         | 9         |
| Graphene oxide                      | 24.92                       | nm               | 193.902                       | 10        |
| Magnetic multi-wall carbon nanotube | 61.74                       | Crystalline      | 15.87                         | 11        |
| MOF-235                             | nm                          | Crystalline      | 187                           | 3         |
| 1:1 Cu-Z-GO-M                       | 46.696                      | Crystalline      | 94.481                        | 12        |
| Fe-BDC MOF                          | 46.02                       | Crystalline      | 8.65                          | 13        |
| Pine leaves                         | nm                          | nm               | 126.58                        | 14        |

|                                             |        |                  |        |    |
|---------------------------------------------|--------|------------------|--------|----|
| Citric Acid Modified Sawdust                | nm     | Semi-crystalline | 111.46 | 15 |
| Turmeric powder                             | 106.12 | nm               | 157.33 | 16 |
| Montmorillonite                             | 22     | Crystalline      | 556    | 17 |
| Natural zeolite                             | nm     | nm               | 19.94  | 18 |
| Fly ash                                     | 6.52   | nm               | 5.72   | 19 |
| Modified Ball clay                          | 92     | nm               | 100    | 20 |
| Activated carbon                            | 1688   | nm               | 270.3  | 21 |
| Natural clay                                | 128    | Crystalline      | 62.5   | 22 |
| carbon/montmorillonite nanocomposites       | 41.8   | Crystalline      | 138.1  | 23 |
| Kaolin                                      | 61.13  | nm               | 45.0   | 24 |
| Carbon nanotubes                            | 160    | nm               | 64.7   | 25 |
| Rice husk                                   | nm     | nm               | 40.58  | 26 |
| Rhassoul-clay                               | nm     | nm               | 166    | 27 |
| NaOH-treated raw kaolin                     | nm     | nm               | 16.34  | 9  |
| MIL-101(Cr)                                 | 1144   | Crystalline      | 22     | 28 |
| Fe <sub>3</sub> O <sub>4</sub> @MIL-100(Fe) | 366.14 | Crystalline      | 49     | 29 |



|                                                                                               |       |                  |       |    |
|-----------------------------------------------------------------------------------------------|-------|------------------|-------|----|
| Zn-MOF                                                                                        | nm    | Crystalline      | .75   | 30 |
| MWCNT                                                                                         | 217   | nm               | 45.2  | 31 |
| MWCNTs/Fe <sub>2</sub> O <sub>3</sub>                                                         | 114   | Crystalline      | 42.3  | 32 |
| H <sub>6</sub> P <sub>2</sub> W <sub>18</sub> O <sub>62</sub> /MOF-5                          | 395   | Crystalline      | 33.3  | 33 |
| UiO-66-2.7Ti                                                                                  | 929   | Crystalline      | 33.3  | 34 |
| UiO-66                                                                                        | 1358  | Crystalline      | 283   | 34 |
| MIL101-Cr/PANI/Ag                                                                             | 2861  | Crystalline      | 43.29 | 35 |
| Co <sub>0.3</sub> Ni <sub>0.7</sub> Fe <sub>2</sub> O <sub>4</sub> @SiO <sub>2</sub> membrane | 32.4  | Crystalline      | 107.5 | 36 |
| Graphene nanosheet                                                                            | nm    | Amorphous        | 111.6 | 37 |
| Ultrathin-shell BN hollow sphere                                                              | 215   | Crystalline      | 191.7 | 38 |
| Hollow octahedral carbon cage                                                                 | 1711  | Crystalline      | 198.9 | 39 |
| Hierarchical WO <sub>3</sub> hydrate                                                          | 78.4  | Crystalline      | 247.3 | 40 |
| Well-defined microporous carbon                                                               | 2264  | microcrystalline | 292   | 41 |
| Polymer organic framework                                                                     | 3270  | nm               | 351   | 42 |
| Graphene oxide-chitosan hydrogel                                                              | nm    | Crystalline      | 390   | 43 |
| Activated carbon nanotube                                                                     | 729.3 | Crystalline      | 399   | 44 |

|                                                              |      |             |      |    |
|--------------------------------------------------------------|------|-------------|------|----|
| TpPa-COOH covalent triazine framework                        | 183  | Crystalline | 410  | 45 |
| PUS-MOP-A porous polymer composite                           | 306  | Amorphous   | 240  | 46 |
| CMP-YA conjugated microporous polymer                        | 1410 | Amorphous   | 1016 | 47 |
| TPP-NH <sub>2</sub> porous organic polymer                   | 863  | Amorphous   | 205  | 48 |
| CalP covalent calix[4]arene polymer                          | 596  | Amorphous   | 625  | 49 |
| THPP silsesquioxane porous polymer                           | 915  | Amorphous   | 862  | 50 |
| TTMP microporous organic polymer                             | 822  | Amorphous   | 198  | 51 |
| Fe-BC inorganic mesoporous biochar                           | 217  | Crystalline | 156  | 52 |
| HMONs-COOH microporous organic polymer                       | 484  | nm          | 198  | 53 |
| Holey graphene nanosheets (Carbonaceous adsorbents)          | 1053 | nm          | 269  | 54 |
| NPCNS-10 (Carbonaceous adsorbents)                           | 1120 | Amorphous   | 962  | 55 |
| Ordered mesoporous carbon (Carbonaceous adsorbents)          | 2580 | Amorphous   | 758  | 56 |
| Porous Carbon sheets (Carbonaceous adsorbents)               | 2315 | Amorphous   | 769  | 57 |
| ZJU-24 (Metal-organic-framework-based adsorbents)            | 1189 | nm          | 902  | 58 |
| BIT-1 (Metal-organic-framework-based adsorbents)             | nm   | nm          | 810  | 59 |
| Amino-MIL-101(Al) (Metal-organic-framework-based adsorbents) | 1980 | Crystalline | 762  | 60 |

|                                                |      |           |     |    |
|------------------------------------------------|------|-----------|-----|----|
| THPS (Porous-organic-polymer-based adsorbents) | 1426 | Amorphous | 330 | 61 |
|------------------------------------------------|------|-----------|-----|----|

nm- not mentioned

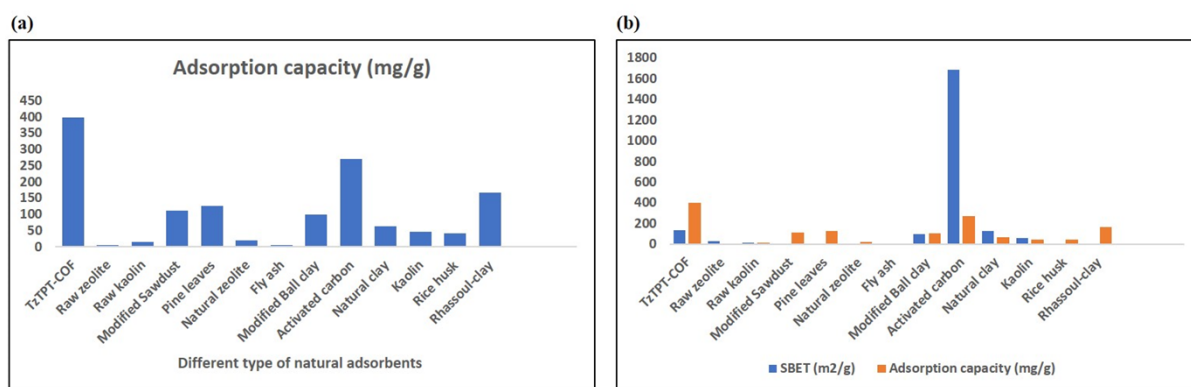

**Figure S26.** (a) Comparison of the adsorption capacity of TzTPT-COF with different type of natural adsorbents, (b) Comparison of the adsorption capacity and Bet Surface area of TzTPT-COF with different type of natural adsorbents.

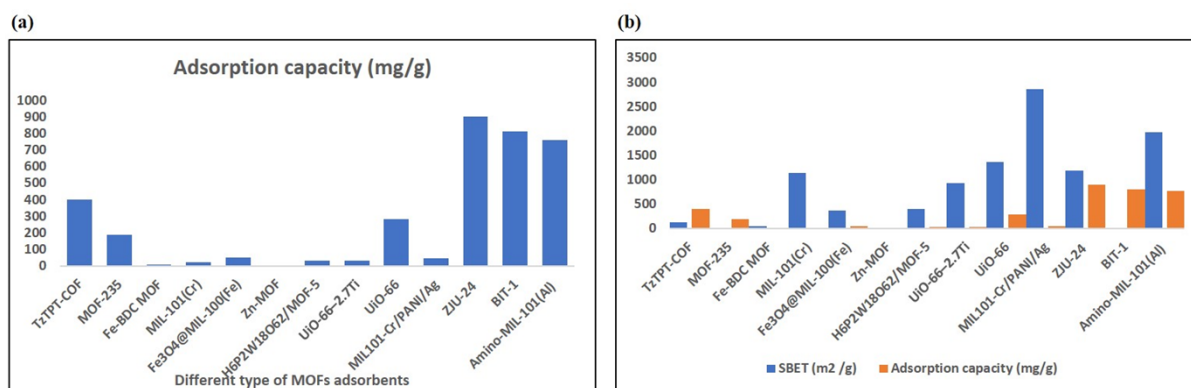

**Figure S27.** (a) Comparison of the adsorption capacity of TzTPT-COF with different type of MOFs adsorbents, (b) Comparison of the adsorption capacity and Bet Surface area of TzTPT-COF with different type of MOFs adsorbents.

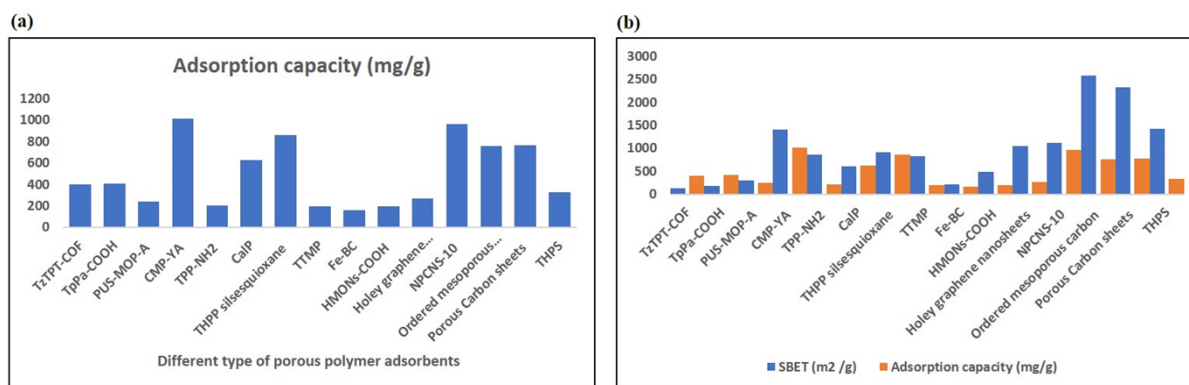

**Figure S28.** (a) Comparison of the adsorption capacity of TzTPT-COF with different type of porous polymer adsorbents, (b) Comparison of the adsorption capacity and Bet Surface area of TzTPT-COF with different type of porous polymer adsorbents.

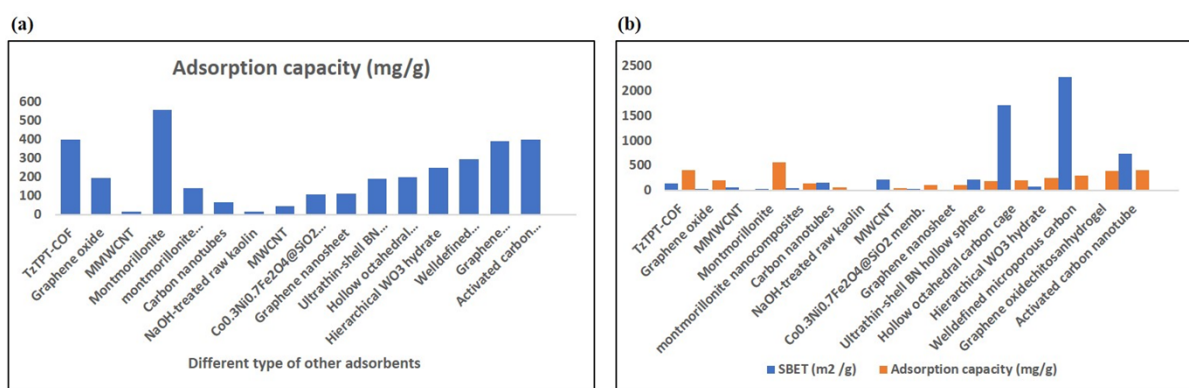

**Figure S29.** (a) Comparison of the adsorption capacity of TzTPT-COF with different type of other adsorbents, (b) Comparison of the adsorption capacity and Bet Surface area of TzTPT-COF with different type of other adsorbents.

## References

1. R.-L. Wang, D.-P. Li, L.-J. Wang, X. Zhang, Z.-Y. Zhou, J.-L. Mu and Z.-M. Su, The preparation of new covalent organic framework embedded with silver nanoparticles and its applications in degradation of organic pollutants from waste water, *Dalton Transactions*, 2019, **48**, 1051-1059.
2. S. Haldar, D. Kaleeswaran, D. Rase, K. Roy, S. Ogale and R. Vaidhyanathan, Tuning the electronic energy level of covalent organic frameworks for crafting high-rate Na-ion battery anode, *Nanoscale Horizons*, 2020, **5**, 1264-1273.
3. E. Haque, J. W. Jun and S. H. Jung, Adsorptive removal of methyl orange and methylene blue from aqueous solution with a metal-organic framework material, iron terephthalate (MOF-235), *Journal of Hazardous Materials*, 2011, **185**, 507-511.
4. T. Xu, S. An, C. Peng, J. Hu and H. Liu, Construction of Large-Pore Crystalline Covalent Organic Framework as High-Performance Adsorbent for Rhodamine B Dye Removal, *Industrial & Engineering Chemistry Research*, 2020, **59**, 8315-8322.

5. Y. Hou, J. Sun, D. Zhang, D. Qi and J. Jiang, Porphyrin–Alkaline Earth MOFs with the Highest Adsorption Capacity for Methylene Blue, *Chemistry – A European Journal*, 2016, **22**, 6345-6352.
6. L. Li, X. L. Liu, H. Y. Geng, B. Hu, G. W. Song and Z. S. Xu, A MOF/graphite oxide hybrid (MOF: HKUST-1) material for the adsorption of methylene blue from aqueous solution, *Journal of Materials Chemistry A*, 2013, **1**, 10292-10299.
7. S. Grimme, S. Ehrlich and L. Goerigk, Effect of the damping function in dispersion corrected density functional theory, *Journal of Computational Chemistry*, 2011, **32**, 1456-1465.
8. X. Jin, M.-q. Jiang, X.-q. Shan, Z.-g. Pei and Z. Chen, Adsorption of methylene blue and orange II onto unmodified and surfactant-modified zeolite, *Journal of Colloid and Interface Science*, 2008, **328**, 243-247.
9. D. Ghosh and K. G. Bhattacharyya, Adsorption of methylene blue on kaolinite, *Applied Clay Science*, 2002, **20**, 295-300.
10. K. He, G. Chen, G. Zeng, A. Chen, Z. Huang, J. Shi, M. Peng, T. Huang and L. Hu, Enhanced removal performance for methylene blue by kaolin with graphene oxide modification, *Journal of the Taiwan Institute of Chemical Engineers*, 2018, **89**, 77-85.
11. J.-L. Gong, B. Wang, G.-M. Zeng, C.-P. Yang, C.-G. Niu, Q.-Y. Niu, W.-J. Zhou and Y. Liang, Removal of cationic dyes from aqueous solution using magnetic multi-wall carbon nanotube nanocomposite as adsorbent, *Journal of Hazardous Materials*, 2009, **164**, 1517-1522.
12. T. Huang, M. Yan, K. He, Z. Huang, G. Zeng, A. Chen, M. Peng, H. Li, L. Yuan and G. Chen, Efficient removal of methylene blue from aqueous solutions using magnetic graphene oxide modified zeolite, *Journal of Colloid and Interface Science*, 2019, **543**, 43-51.
13. C. Arora, S. Soni, S. Sahu, J. Mittal, P. Kumar and P. K. Bajpai, Iron based metal organic framework for efficient removal of methylene blue dye from industrial waste, *Journal of Molecular Liquids*, 2019, **284**, 343-352.
14. M. T. Yagub, T. K. Sen and H. M. Ang, Equilibrium, Kinetics, and Thermodynamics of Methylene Blue Adsorption by Pine Tree Leaves, *Water, Air, & Soil Pollution*, 2012, **223**, 5267-5282.
15. W. Zou, H. Bai, S. Gao and K. Li, Characterization of modified sawdust, kinetic and equilibrium study about methylene blue adsorption in batch mode, *Korean Journal of Chemical Engineering*, 2013, **30**, 111-122.
16. K. T. Kubra, M. S. Salman and M. N. Hasan, Enhanced toxic dye removal from wastewater using biodegradable polymeric natural adsorbent, *Journal of Molecular Liquids*, 2021, **328**, 115468.
17. F. G. E. Nogueira, J. H. Lopes, A. C. Silva, M. Gonçalves, A. S. Anastácio, K. Sapag and L. C. A. Oliveira, Reactive adsorption of methylene blue on montmorillonite via an ESI-MS study, *Applied Clay Science*, 2009, **43**, 190-195.
18. R. Han, J. Zhang, P. Han, Y. Wang, Z. Zhao and M. Tang, Study of equilibrium, kinetic and thermodynamic parameters about methylene blue adsorption onto natural zeolite, *Chemical Engineering Journal*, 2009, **145**, 496-504.
19. K. V. Kumar, V. Ramamurthi and S. Sivanesan, Modeling the mechanism involved during the sorption of methylene blue onto fly ash, *Journal of Colloid and Interface Science*, 2005, **284**, 14-21.
20. M. Auta and B. H. Hameed, Modified mesoporous clay adsorbent for adsorption isotherm and kinetics of methylene blue, *Chemical Engineering Journal*, 2012, **198-199**, 219-227.
21. Y. Li, Q. Du, T. Liu, X. Peng, J. Wang, J. Sun, Y. Wang, S. Wu, Z. Wang, Y. Xia and L. Xia, Comparative study of methylene blue dye adsorption onto activated carbon, graphene oxide, and carbon nanotubes, *Chemical Engineering Research and Design*, 2013, **91**, 361-368.
22. O. Sakin Omer, M. A. Hussein, B. H. M. Hussein and A. Mgaidi, Adsorption thermodynamics of cationic dyes (methylene blue and crystal violet) to a natural clay mineral from aqueous solution between 293.15 and 323.15 K, *Arabian Journal of Chemistry*, 2018, **11**, 615-623.

23. D. S. Tong, C. W. Wu, M. O. Adebajo, G. C. Jin, W. H. Yu, S. F. Ji and C. H. Zhou, Adsorption of methylene blue from aqueous solution onto porous cellulose-derived carbon/montmorillonite nanocomposites, *Applied Clay Science*, 2018, **161**, 256-264.
24. K. Rida, S. Bouraoui and S. Hadnine, Adsorption of methylene blue from aqueous solution by kaolin and zeolite, *Applied Clay Science*, 2013, **83-84**, 99-105.
25. Y. Yao, F. Xu, M. Chen, Z. Xu and Z. Zhu, Adsorption behavior of methylene blue on carbon nanotubes, *Bioresource Technology*, 2010, **101**, 3040-3046.
26. V. Vadivelan and K. V. Kumar, Equilibrium, kinetics, mechanism, and process design for the sorption of methylene blue onto rice husk, *Journal of Colloid and Interface Science*, 2005, **286**, 90-100.
27. Y. Bentahar, K. Draoui, C. Hurel, O. Ajouyed, S. Khairoun and N. Marmier, Physico-chemical characterization and valorization of swelling and non-swelling Moroccan clays in basic dye removal from aqueous solutions, *Journal of African Earth Sciences*, 2019, **154**, 80-88.
28. T. Shen, J. Luo, S. Zhang and X. Luo, Hierarchically mesostructured MIL-101 metal-organic frameworks with different mineralizing agents for adsorptive removal of methyl orange and methylene blue from aqueous solution, *Journal of Environmental Chemical Engineering*, 2015, **3**, 1372-1383.
29. Y. Shao, L. Zhou, C. Bao, J. Ma, M. Liu and F. Wang, Magnetic responsive metal-organic frameworks nanosphere with core-shell structure for highly efficient removal of methylene blue, *Chemical Engineering Journal*, 2016, **283**, 1127-1136.
30. C.-Y. Sun, X.-L. Wang, C. Qin, J.-L. Jin, Z.-M. Su, P. Huang and K.-Z. Shao, Solvatochromic Behavior of Chiral Mesoporous Metal-Organic Frameworks and Their Applications for Sensing Small Molecules and Separating Cationic Dyes, *Chemistry – A European Journal*, 2013, **19**, 3639-3645.
31. S. Wang, C. W. Ng, W. Wang, Q. Li and Z. Hao, Synergistic and competitive adsorption of organic dyes on multiwalled carbon nanotubes, *Chemical Engineering Journal*, 2012, **197**, 34-40.
32. S. Qu, F. Huang, S. Yu, G. Chen and J. Kong, Magnetic removal of dyes from aqueous solution using multi-walled carbon nanotubes filled with Fe<sub>2</sub>O<sub>3</sub> particles, *Journal of Hazardous Materials*, 2008, **160**, 643-647.
33. X. Liu, W. Gong, J. Luo, C. Zou, Y. Yang and S. Yang, Selective adsorption of cationic dyes from aqueous solution by polyoxometalate-based metal-organic framework composite, *Applied Surface Science*, 2016, **362**, 517-524.
34. Y. Han, M. Liu, K. Li, Q. Sun, W. Zhang, C. Song, G. Zhang, Z. Conrad Zhang and X. Guo, In situ synthesis of titanium doped hybrid metal-organic framework UiO-66 with enhanced adsorption capacity for organic dyes, *Inorganic Chemistry Frontiers*, 2017, **4**, 1870-1880.
35. K. Karami, S. M. Beram, P. Bayat, F. Siadatnasab and A. Ramezanzpour, A novel nanohybrid based on metal-organic framework MIL101-Cr/PANI/Ag for the adsorption of cationic methylene blue dye from aqueous solution, *Journal of Molecular Structure*, 2022, **1247**, 131352.
36. Z. Zhu, G. Li, G. Zeng, X. Chen, D. Hu, Y. Zhang and Y. Sun, Fast capture of methyl-dyes over hierarchical amino-Co<sub>0.3</sub>Ni<sub>0.7</sub>Fe<sub>2</sub>O<sub>4</sub>@SiO<sub>2</sub> nanofibrous membranes, *Journal of Materials Chemistry A*, 2015, **3**, 22000-22004.
37. Z.-J. Fan, W. Kai, J. Yan, T. Wei, L.-J. Zhi, J. Feng, Y.-m. Ren, L.-P. Song and F. Wei, Facile Synthesis of Graphene Nanosheets via Fe Reduction of Exfoliated Graphite Oxide, *ACS Nano*, 2011, **5**, 191-198.
38. G. Lian, X. Zhang, S. Zhang, D. Liu, D. Cui and Q. Wang, Controlled fabrication of ultrathin-shell BN hollow spheres with excellent performance in hydrogen storage and wastewater treatment, *Energy & Environmental Science*, 2012, **5**, 7072-7080.

39. A. Aijaz, J.-K. Sun, P. Pachfule, T. Uchida and Q. Xu, From a metal–organic framework to hierarchical high surface-area hollow octahedral carbon cages, *Chemical Communications*, 2015, **51**, 13945-13948.
40. B. Liu, J. Wang, J. Wu, H. Li, Z. Li, M. Zhou and T. Zuo, Controlled fabrication of hierarchical WO<sub>3</sub> hydrates with excellent adsorption performance, *Journal of Materials Chemistry A*, 2014, **2**, 1947-1954.
41. Z. Li, D. Wu, Y. Liang, R. Fu and K. Matyjaszewski, Synthesis of Well-Defined Microporous Carbons by Molecular-Scale Templating with Polyhedral Oligomeric Silsesquioxane Moieties, *Journal of the American Chemical Society*, 2014, **136**, 4805-4808.
42. P. Kuhn, K. Krüger, A. Thomas and M. Antonietti, “Everything is surface”: tunable polymer organic frameworks with ultrahigh dye sorption capacity, *Chemical Communications*, 2008, DOI: 10.1039/B814254H, 5815-5817.
43. Y. Chen, L. Chen, H. Bai and L. Li, Graphene oxide–chitosan composite hydrogels as broad-spectrum adsorbents for water purification, *Journal of Materials Chemistry A*, 2013, **1**, 1992-2001.
44. J. Ma, F. Yu, L. Zhou, L. Jin, M. Yang, J. Luan, Y. Tang, H. Fan, Z. Yuan and J. Chen, Enhanced Adsorptive Removal of Methyl Orange and Methylene Blue from Aqueous Solution by Alkali-Activated Multiwalled Carbon Nanotubes, *ACS Applied Materials & Interfaces*, 2012, **4**, 5749-5760.
45. B. Dong, W.-J. Wang, S.-C. Xi, D.-Y. Wang and R. Wang, A Carboxyl-Functionalized Covalent Organic Framework Synthesized in a Deep Eutectic Solvent for Dye Adsorption, *Chemistry – A European Journal*, 2021, **27**, 2692-2698.
46. T. J. Choi, D. Y. Kim and J. Y. Chang, Water wettable, compressible, and hierarchically porous polymer composite, *Microporous and Mesoporous Materials*, 2017, **242**, 82-89.
47. Y. Yuan, H. Huang, L. Chen and Y. Chen, N,N'-Bicarbazole: A Versatile Building Block toward the Construction of Conjugated Porous Polymers for CO<sub>2</sub> Capture and Dyes Adsorption, *Macromolecules*, 2017, **50**, 4993-5003.
48. Y. He, T. Xu, J. Hu, C. Peng, Q. Yang, H. Wang and H. Liu, Amine functionalized 3D porous organic polymer as an effective adsorbent for removing organic dyes and solvents, *RSC Advances*, 2017, **7**, 30500-30505.
49. D. Shetty, I. Jahovic, J. Raya, F. Ravaux, M. Jouiad, J.-C. Olsen and A. Trabolsi, An ultra-absorbent alkyne-rich porous covalent polycalix[4]arene for water purification, *Journal of Materials Chemistry A*, 2017, **5**, 62-66.
50. M. Ge and H. Liu, A silsesquioxane-based thiophene-bridged hybrid nanoporous network as a highly efficient adsorbent for wastewater treatment, *Journal of Materials Chemistry A*, 2016, **4**, 16714-16722.
51. R. Bera, M. Ansari, S. Mondal and N. Das, Selective CO<sub>2</sub> capture and versatile dye adsorption using a microporous polymer with triptycene and 1,2,3-triazole motifs, *European Polymer Journal*, 2018, **99**, 259-267.
52. R. Lin, Z. Liang, C. Yang, Z. Zhao and F. Cui, Selective adsorption of organic pigments on inorganically modified mesoporous biochar and its mechanism based on molecular structure, *Journal of Colloid and Interface Science*, 2020, **573**, 21-30.
53. M. Zhou, Z. He, T. Wang, Y. Xu, W. Yu, B. Shi and K. Huang, Carboxyl group functionalized hollow microporous organic nanospheres for efficient catalysis and adsorption, *Microporous and Mesoporous Materials*, 2019, **274**, 245-250.
54. Z. Xing, J. Tian, Q. Liu, A. M. Asiri, P. Jiang and X. Sun, Holey graphene nanosheets: large-scale rapid preparation and their application toward highly-effective water cleaning, *Nanoscale*, 2014, **6**, 11659-11663.
55. J. Gong, H. Lin, M. Antonietti and J. Yuan, Nitrogen-doped porous carbon nanosheets derived from poly(ionic liquid)s: hierarchical pore structures for efficient CO<sub>2</sub> capture and dye removal, *Journal of Materials Chemistry A*, 2016, **4**, 7313-7321.

56. X. Zhuang, Y. Wan, C. Feng, Y. Shen and D. Zhao, Highly Efficient Adsorption of Bulky Dye Molecules in Wastewater on Ordered Mesoporous Carbons, *Chemistry of Materials*, 2009, **21**, 706-716.
57. J. Gong, J. Liu, X. Chen, Z. Jiang, X. Wen, E. Mijowska and T. Tang, Converting real-world mixed waste plastics into porous carbon nanosheets with excellent performance in the adsorption of an organic dye from wastewater, *Journal of Materials Chemistry A*, 2015, **3**, 341-351.
58. Q. Zhang, J. Yu, J. Cai, R. Song, Y. Cui, Y. Yang, B. Chen and G. Qian, A porous metal–organic framework with –COOH groups for highly efficient pollutant removal, *Chemical Communications*, 2014, **50**, 14455-14458.
59. R. Li, X. Ren, J. Zhao, X. Feng, X. Jiang, X. Fan, Z. Lin, X. Li, C. Hu and B. Wang, Polyoxometallates trapped in a zeolitic imidazolate framework leading to high uptake and selectivity of bioactive molecules, *Journal of Materials Chemistry A*, 2014, **2**, 2168-2173.
60. E. Haque, V. Lo, A. I. Minett, A. T. Harris and T. L. Church, Dichotomous adsorption behaviour of dyes on an amino-functionalised metal–organic framework, amino-MIL-101(Al), *Journal of Materials Chemistry A*, 2014, **2**, 193-203.
61. C. Zhang, P.-C. Zhu, L. Tan, J.-M. Liu, B. Tan, X.-L. Yang and H.-B. Xu, Triptycene-Based Hyper-Cross-Linked Polymer Sponge for Gas Storage and Water Treatment, *Macromolecules*, 2015, **48**, 8509-8514.
